1 **The small acid-soluble proteins of *Clostridioides difficile* are important for UV resistance**  
2 **and serve as a check point for sporulation.**

3

4 Hailee N. Nerber and Joseph A. Sorg\*

5

6 Department of Biology, Texas A&M University, College Station, TX 77845

7

8 \*corresponding author

9

10 PH: 979-845-6299

11 Email: [jsorg@bio.tamu.edu](mailto:jsorg@bio.tamu.edu)

12 **Abstract**

13 *Clostridioides difficile* is a nosocomial pathogen which causes severe diarrhea and colonic  
14 inflammation. *C. difficile* causes disease in susceptible patients when endospores germinate  
15 into the toxin-producing vegetative form. The action of these toxins results in diarrhea and the  
16 spread of spores into the hospital and healthcare environments. Thus, the destruction of spores  
17 is imperative to prevent disease transmission between patients. However, spores are resilient  
18 and survive extreme temperatures, chemical exposure, and UV treatment. This makes their  
19 elimination from the environment difficult and perpetuates their spread between patients. In the  
20 model spore-forming organism, *Bacillus subtilis*, the small acid-soluble proteins (SASPs)  
21 contribute to these resistances. The SASPs are a family of small proteins found in all  
22 endospore-forming organisms, *C. difficile* included. Although these proteins have high sequence  
23 similarity between organisms, the role(s) of the proteins differ. Here, we investigated the role of  
24 the main  $\alpha/\beta$  SASPs, SspA and SspB, and two annotated SASPs, CDR20291\_1130 and  
25 CDR20291\_3080, in protecting *C. difficile* spores from environmental insults. We found that  
26 SspA is necessary for conferring spore UV resistance, SspB minorly contributes, and the  
27 annotated SASPs do not contribute to UV resistance. In addition, none of these SASPs  
28 contribute to the resistance of tested chemicals. Surprisingly, the combined deletion of *sspA* and  
29 *sspB* prevented spore formation. Overall, our data indicate that UV resistance of *C. difficile*  
30 spores is dependent on SspA and that SspA and SspB regulate / serve as a checkpoint for  
31 spore formation, a previously unreported function of SASPs.

32

33

34

35

36 **Importance**

37 *C. difficile* infections remain problematic and elimination of spores within an environment is  
38 essential to limit person-to-person spread. A deeper understanding of how spores resist  
39 cleaning efforts could lead to better strategies to eradicate the spores in a contaminated  
40 environment. The small acid-soluble proteins (SASPs), found in all endospore-forming  
41 organisms, are one mechanism that allows for spore resilience. Here, we find that *C. difficile*  
42 SspA and SspB protect against UV light. Unexpectedly, these SASPs also regulate spore  
43 formation, a role not described for any SASP to date.

44

45

46

47

48

49

50

51

52

53

54

55

56

## 57 Introduction

58 *Clostridioides difficile* is the leading cause of antibiotic associated diarrhea with  
59 ~224,000 annual infections in the United States [1-3]. Prior antibiotic treatment is the greatest  
60 risk factor for *C. difficile* infection due to their broad-spectrum activity that can lead to a dysbiotic  
61 colonic microbial community [4, 5]. Upon inoculation into a susceptible host, *C. difficile* spores  
62 germinate to the toxin-producing vegetative form [4]. These toxins lead to the disruption of the  
63 colonic epithelium and the common symptoms of disease (e.g., diarrhea and colitis) [4].  
64 Vancomycin and fidaxomicin are the recommended treatments for *C. difficile* infection [4, 6].  
65 While these antibiotics treat the infection by targeting the actively-growing vegetative cells, the  
66 spore form is resistant to antibiotics [5, 7]. In contrast to the anaerobic nature of the *C. difficile*  
67 vegetative cell, spores can survive the oxygen-rich environment outside of a host, and are  
68 considered the transmissible form [5, 8-10].

69 Endospores are dormant forms of bacteria that can withstand extreme environmental  
70 conditions and chemical exposures [11]. In all endospore-forming bacteria, sporulation is  
71 controlled by the master transcriptional regulator, Spo0A [10]. Activation of Spo0A by  
72 phosphorylation results in the global activation of gene expression with the end goal of  
73 optimizing / surviving post-exponential phase growth [12-14]. Upon the initiation of sporulation,  
74 the vegetative cell divides asymmetrically, resulting in a large mother cell compartment and a  
75 smaller forespore compartment [13]. Subsequently, a cascade of sigma factor activation occurs  
76 and leads to the development of a dormant endospore [13]. In *Bacillus subtilis*, a model  
77 organism for studying sporulation and germination, the activation of  $\sigma^F$  in the forespore, leads to  
78  $\sigma^E$  activation in the mother cell. The activation of  $\sigma^E$  in the mother cell, in turn, leads to activation  
79 of  $\sigma^G$  in the forespore and then results in the activation of  $\sigma^K$  in the mother cell. The result of this  
80 crisscross sigma factor activation cascade is the engulfment of the forespore by the mother cell,  
81 maturation of the forespore, and the eventual release of the spore by lysis of the mother cell; the

82 same sigma factors drive *C. difficile* sporulation but the crisscross activation across  
83 compartments does not occur [12, 13, 15-17]. The resulting spores are extremely resistant to  
84 environmental conditions and common cleaning methods [11, 18]. Thus, with a deeper  
85 understanding of the resistance properties of spores, and the mechanisms that confer this  
86 resistance, novel interventions could be developed to clean contaminated environments.

87         The small acid-soluble proteins (SASPs) confer resistance to spores [11, 19]. The  
88 SASPs are a family of proteins that are less than 100 amino acids in length and are conserved  
89 among all endospore forming organisms [19]. They are produced late in sporulation under the  
90 forespore-specific sigma factor,  $\sigma^G$ , and account for approximately 20% of the total spore  
91 protein content [11, 16, 19]. Most spore-forming bacteria encode the two major  $\alpha/\beta$ -type SASPs  
92 (SspA and SspB), however there are other minor SASPs that vary in number depending on the  
93 organism [19-23]. *B. subtilis* also encodes a  $\gamma$ -type SASP that is hypothesized to serve as an  
94 amino acid reservoir for use upon outgrowth of the vegetative cell from the germinated spore  
95 [24]. Clostridial species, to date, have not been found to contain  $\gamma$ -type SASPs [20, 21]. In *C.*  
96 *difficile*, the R20291 strain encodes *sspA* and *sspB* orthologues and two genes annotated as  
97 putative SASPs, *CDR20291\_1130* and *CDR20291\_3080*. SASPs are well-conserved across  
98 genera with 70% similarity between *C. difficile* and *B. subtilis* SspA and SspB [25]. However, the  
99 annotated SASPs have less similarity to *C. difficile* or *B. subtilis* SspA and SspB, ranging from  
100 40-60%. Interestingly, *CDR20291\_3080* shares 80% similarity to *C. perfringens* Ssp4, a novel  
101 SASP, which protects the spores from nitrous acid and extreme heat associated with food  
102 processing [23, 26].

103         In *B. subtilis*, the  $\alpha/\beta$ -type SASPs contribute to spore resistance against several  
104 chemicals, such as nitrous acid, formaldehyde, glutaraldehyde, iodine, or hydrogen peroxide  
105 [18, 26-34]. Moreover, *B. subtilis*  $\Delta$ *sspA* mutants completely lose viability after 3 minutes of  
106 exposure to 254 nm UV light, and *B. subtilis*  $\Delta$ *sspB* mutants have 10% survival after 7 minutes

107 of exposure [35]. Interestingly, a double mutant was even more sensitive to UV exposure than  
108 were vegetative cells, highlighting the importance of these proteins in spore survival [35]. These  
109 UV-sensitive phenotypes could be complemented by expressing, *in trans*, either *sspA* or *sspB*  
110 [36]. Moreover, a SASP from *B. megaterium* complemented the phenotype, suggesting that they  
111 could play interchangeable roles in UV resistance [31, 36].

112 In other spore-forming bacteria, the role of the SASPs vary among organisms. In *C.*  
113 *botulinum*, SASPs were found to be necessary for protection against nitrous acid, similar to  
114 what is observed in *B. subtilis* [28]. However, they are not necessary for protection against  
115 hydrogen peroxide or formaldehyde, contrary to what is observed in *B. subtilis* [28]. In *C.*  
116 *perfringens* isolates that cause food poisoning, Ssp4 was necessary for spores surviving food  
117 processing events (e.g., high heat and use of nitrites) [23, 26]. Other *C. perfringens* SASPs  
118 were found to protect spores against UV light, hydrogen peroxide, nitrous acid, formaldehyde,  
119 and hydrochloric acid [29, 37, 38].

120 The  $\alpha/\beta$ -type SASPs of *B. subtilis*, *C. perfringens*, and *C. acetobutylicum* all bind to DNA  
121 *in vitro* [37, 39-41]. In *B. subtilis*, the binding of these proteins changes the confirmation of the  
122 DNA to one between an A and a B form [39, 41-43]. In this unique conformation, an alternative  
123 form of UV damage is induced, a thymidyl-thymidine adduct, called the spore photoproduct. The  
124 spore photoproduct is repaired by the spore photoproduct lyase, SPL, during germination and  
125 outgrowth [25, 44-48].

126 Here, we investigate the functions of *C. difficile* *sspA*, *sspB*, and the annotated SASPs,  
127 *CDR20291\_1130* and *CDR20291\_3080*. We found that *C. difficile* SspA is the major contributor  
128 to UV resistance of the spores and that SspB is minorly involved in UV resistance.  
129 *CDR20291\_1130* and *CDR20291\_3080* do not contribute to UV resistance. Additionally, none  
130 of the SASPs contribute to spore chemical resistance in the concentrations and exposure times  
131 tested. Surprisingly, we found that the deletion of both *sspA* and *sspB* prevented spore

132 formation. Our results indicate that, in addition to providing UV resistance to spores, the major  
133 *C. difficile* SASPs are involved in spore formation.

134

## 135 **Results**

### 136 *Conservation of SASPs in C. difficile*

137 The main  $\alpha/\beta$  type SASPs are conserved in spore-forming bacteria [19]. Within *C.*  
138 *difficile*, SspA and SspB are 85% identical. The putative SASPs are approximately 40% identical  
139 to the main  $\alpha/\beta$  type SASPs. All 4 contain the conserved “EIA” sequence that is cleaved by the  
140 germination protease (GPR) upon germination (Figure 1) [49-51]. Even with strong sequence  
141 similarity / identity, SASPs have varying roles between spore forming organisms. To investigate  
142 the roles of *C. difficile* *sspA*, *sspB*, *CDR20291\_1130*, and *CDR20291\_3080* in UV resistance,  
143 outgrowth, and chemical resistance, single deletions and pairwise deletions were generated  
144 using CRISPR-Cas9 genome editing [52]. Total amounts of spores produced and the  
145 sporulation rates by the single deletion strains, *C. difficile*  $\Delta$ *sspA*, *C. difficile*  $\Delta$ *CDR20291\_1130*,  
146 and *C. difficile*  $\Delta$ *CDR20291\_3080* were indistinguishable from the wildtype *C. difficile* R20291  
147 parental strain (Figure S1). Surprisingly, the *C. difficile*  $\Delta$ *sspB* strain did not make spores and  
148 will be discussed later. These results indicate that the single deletions of *C. difficile* *sspA*, *C.*  
149 *difficile* *CDR20291\_1130* and *C. difficile* *CDR20291\_3080* do not impact *C. difficile* sporulation.

150

### 151 *sspA is required for spore UV resistance*

152 Because of the strong phenotype of *B. subtilis* SASPs in UV resistance, we  
153 hypothesized that *C. difficile* SspA, and / or the two annotated SASPs (*CDR20291\_1130* and  
154 *CDR20291\_3080*) may function similarly. The viability of SASP mutants after a 10 minute

155 exposure to 302 nm UV light was tested. Viable spores were quantified by colony formation on  
156 media supplemented with taurocholate (a *C. difficile* spore germinant) and then compared to  
157 spores derived from the wildtype parental strain [53]. Exposure of the *C. difficile*  $\Delta sspA$  strain to  
158 UV light resulted in a ~1,000x decrease in spore survival. Spores derived from the *C. difficile*  
159  $\Delta CDR20291\_1130$  and *C. difficile*  $\Delta CDR20291\_3080$  mutants had a statistically significant  
160 difference in UV resistance compared to spores derived from the wildtype strain, but this  
161 difference is likely not biologically relevant (Figure 2A). These results indicate that *C. difficile*  
162 SspA is the most important SASP for UV resistance while the genes annotated as putative  
163 SASPs are not involved in UV resistance. In *B. subtilis*, SASP binding to DNA helps to protect  
164 from UV by encouraging the formation of spore photoproducts (SP) instead of cyclobutane  
165 thymine dimers [18, 54]. The spore photoproduct lyase, SPL, repairs the SP [44-46, 55]. To  
166 understand the impact of SPL on UV resistance in *C. difficile*, we engineered a deletion in the *C.*  
167 *difficile spl* gene. Spores derived from *C. difficile*  $\Delta spl$  strain have approximately 10x reduced  
168 survival compared to spores derived from the wildtype *C. difficile* R20291 strain (Figure 2A).  
169 Unsurprisingly, the *C. difficile*  $\Delta sspA \Delta spl$  double mutant remains at the level of *sspA* mutant  
170 alone (0.1% of wildtype), suggesting that SPL functions in a capacity where without SspA, SPL  
171 is not necessary.

172 To determine if the putative SASPs have redundant roles in UV resistance, we  
173 generated deletions of all pairwise combinations of *C. difficile*  $CDR20291\_1130$ , *C. difficile*  
174  $CDR20291\_3080$ , and *C. difficile* *sspA*. After 10 minutes of UV exposure, spores derived from  
175 the *C. difficile*  $\Delta CDR20291\_1130 \Delta CDR20291\_3080$  were as resistant as wildtype spores,  
176 indicating that these annotated SASPs are not compensating for each other during UV exposure  
177 (Figure 2B). Spores derived from the *C. difficile*  $\Delta sspA \Delta CDR20291\_1130$  mutant had no further  
178 reduction in survival compared to the *C. difficile*  $\Delta sspA$  mutant alone. However, spores derived  
179 from the *C. difficile*  $\Delta sspA \Delta CDR20291\_3080$  double mutant and the  $\Delta sspA \Delta CDR20291\_1130$



180  $\Delta CDR20291\_3080$  triple mutant were not as sensitive to UV light as the *C. difficile*  $\Delta sspA$  or the  
181 *C. difficile*  $\Delta sspA \Delta CDR20291\_1130$  strains (Figure 2B).

182

183 *The sspA promoter is necessary for complementation of C. difficile  $\Delta sspA$  UV resistance*

184 To understand the extent of protection that *C. difficile* SspA provides against UV  
185 damage, we quantified the viability of spores exposed to UV over time. Spores derived from the  
186 *C. difficile*  $\Delta sspA$  strain showed a 10% loss of viability after 2.5 minutes of UV exposure. This  
187 loss increased to approximately 3 log<sub>10</sub> after 15 minutes of exposure. Expression of *sspA* from a  
188 plasmid under the control of its native promoter restored viability to the *C. difficile*  $\Delta sspA$  strain  
189 (Figure 3A).

190 To further understand the role of *C. difficile* SspA in UV resistance, we tested the impact  
191 of different *sspA* expression constructs on spore survival. The *sspA* complement consisting of  
192 the *sspA* gene under its native promoter region resulted in restoration of spore viability. A 6x-  
193 histidine tag inserted on the C-terminus of *sspA* also resulted in restoration of spore viability  
194 upon UV exposure (Figure 3B). In *B. subtilis*, SASP genes can cross-complement a SASP  
195 mutant [36]. Therefore, plasmids were constructed that consisted of *C. difficile* *sspB*,  
196 *CDR20291\\_1130*, or the *CDR20291\\_3080* genes, driven by their native promoter regions,  
197 introduced into the *C. difficile*  $\Delta sspA$  mutant strain. After 10 minutes of exposure to UV light,  
198 spores derived with these plasmid constructs revealed that *C. difficile* *sspB*, *CDR20291\\_1130*,  
199 or *CDR20291\\_3080* were unable to restore the UV resistance to spores derived from the  $\Delta sspA$   
200 mutant strain (Figure 3B). To determine if this is an issue with differences in expression, the  
201 promoter regions were changed and these genes were again tested for their ability to  
202 complement the *C. difficile*  $\Delta sspA$  strain. When the *sspA* gene was placed under control of the  
203 *sspB* promoter region, complementation no longer occurred. This further supported our

204 hypothesis of the SASPs containing differences in expression levels. Swapping the promoter  
205 regions of *C. difficile* *sspB*, *CDR20291\_1130*, or *CDR20291\_3080* complementation plasmids  
206 for the *C. difficile* *sspA* promoter region resulted in a restoration to approximately 5% of wildtype  
207 levels (Figure 3C). However, as negative controls, the *sspA* promoter region alone, or the *sspA*  
208 promoter driving the gene encoding mCherry, could not complement the UV phenotype. These  
209 results suggest that despite what is observed for cross-complementation in other organisms, *C.*  
210 *difficile* *sspB*, *CDR20291\_1130*, or *CDR20291\_3080* cannot fully complement the *C. difficile*  
211  $\Delta$ *sspA* strain phenotype, and to provide any complementation, they must be expressed from the  
212 *sspA* promoter.

213

214 *C. difficile* SASPs have redundant functions during outgrowth

215 *C. difficile* *CDR20291\_1130* and *CDR20291\_3080* do not contribute to spore UV  
216 resistance, but it is possible that their main role is to protect against other harsh environmental  
217 conditions or to serve as amino acid reservoirs (like  $\gamma$ -type SASPs of *B. subtilis*) during  
218 outgrowth of a vegetative cell from the germinated spore [24]. To determine if these annotated  
219 SASPs contribute to outgrowth, the OD<sub>600</sub> of spores derived from wildtype and mutant strains  
220 were analyzed over 12 hours in complex medium supplemented with germinants [53, 56]. No  
221 difference in the outgrowth of vegetative cells was observed for the mutant strains, compared to  
222 the wildtype parental strain.

223 It is possible that the complex medium masked the hypothesized phenotype due to the  
224 sheer abundance of nutrients in the medium eliminating the need for the amino acids derived  
225 from the SASPs. Instead, we tested if outgrowth of a spore in minimal medium would be  
226 influenced in these mutant strains. Unfortunately, using a minimal medium resulted in an  
227 extreme delay in outgrowth that was not possible to practically measure. Therefore, spore

228 outgrowth was analyzed in half-strength complex medium. In addition, to eliminate the  
229 possibility of extra resources being packaged into the spore when grown on a complex medium,  
230 and thus reducing the need for SASPs during outgrowth, spores were generated on minimal  
231 medium. Again, despite spore production on minimal medium and using half-strength complex  
232 medium during the assay, there were no differences between the outgrowth of wildtype spores  
233 or spores derived from the *C. difficile*  $\Delta sspA$  or the *C. difficile*  $\Delta CDR20291\_1130$   
234  $\Delta CDR20291\_3080$  double mutant strain (Figure 4A).

235         Due to the possibility that the SASPs can compensate for the deletion of one, a triple  
236 mutant was generated of *sspA*, *CDR20291\\_1130*, and *CDR20291\\_3080*. These spores were  
237 also generated on minimal medium and outgrowth analyzed in half-strength complex media.  
238 Spores derived from the *C. difficile*  $\Delta sspA \Delta CDR20291\_1130 \Delta CDR20291\_3080$  triple mutant  
239 had an approximate 2-hour delay in outgrowth compared to the wildtype strain (Figure 4B). To  
240 eliminate the possibility that the difference in outgrowth is due to a germination defect in this  
241 triple mutant, we monitored germination by OD<sub>600</sub> in buffer supplemented with germinants [53,  
242 56]. During the very early events of endospore germination, the dormant, phase bright, spore  
243 transitions to a phase dark, germinated spore. Mutant spores germinated similarly to wildtype,  
244 suggesting no defect in germination (Figure 4C). These results suggest that *C. difficile* *SspA*,  
245 *CDR20291\\_1130*, and *CDR20291\\_3080* could be used as a nutrient / amino acid source during  
246 outgrowth of a germinated spore.

247

248 *The C. difficile* SASPs do not contribute to chemical resistance

249         To further characterize the role of these proteins in the spore, spores were exposed to  
250 various chemicals. Spores derived from the single deletion of *C. difficile* *sspA*,  
251 *CDR20291\\_1130*, and *CDR20291\\_3080* and their complements, when necessary, were

252 exposed to chemicals for 1 minute, 5 minutes, 10 minutes, and 30 minutes and spore viability  
253 was assessed by plating onto rich medium supplemented with germinant. Colony forming units  
254 were compared to  $T_0$  and then this ratio compared to the ratio of wildtype survival. Spores  
255 exposed to 3%  $H_2O_2$ , 75% EtOH, 0.25% glutaraldehyde, 1 M HCl, 0.05% hypochlorite, and 2.5%  
256 formaldehyde did not exhibit reduced viability in comparison to spores derived from the wildtype  
257 strain (Figure S2A-F). The mutant strains did have a slight reduction in viability after 5 or 10  
258 minutes of exposure to 250 mM nitrous acid (Figure S2G).

259

### 260 *C. difficile* spore formation is influenced by SASPs

261 When generating the *C. difficile*  $\Delta sspB$  mutant strain, we found that spores derived from  
262 this strain were phase gray and were not released from the mother cell, compared to the  
263 wildtype strain (Figure 5A and 5B). This phenotype could be complemented by expression of  
264 the *sspB* gene under the control of the *sspB* promoter region (Figure 5C) or the *sspA* gene  
265 under control of the *sspA* promoter region (Figure 5D). However, only a  $\sigma^G$ -controlled promoter  
266 was able to complement the phenotype, other  $\sigma$ -factor controlled promoters could not  
267 complement (Figures 5E - H). The rate of sporulation of the *C. difficile*  $\Delta sspB$  mutant was also 5  
268  $\log_{10}$  less than the wildtype strain and was complemented by expression of *sspB* from a plasmid  
269 (Figure S3). Surprisingly, whole genome resequencing of the *C. difficile*  $\Delta sspB$  strain revealed  
270 an additional, single nucleotide mutation in *sspA*. This mutation resulted in an *sspA*<sub>G52V</sub> allele, in  
271 addition to the *sspB* deletion (referred to as *sspB*<sub>SNP</sub>).

272 Due to the phenotype of this strain, normal spore purification processes were  
273 unsuccessful. To encourage release of the immature spores from the mother cells, cultures from  
274 sporulating cells were incubated with lysozyme before resuming normal spore purification steps.  
275 This encouraged the spores to release from the mother cells and the recovery of a limited

276 number of phase gray spores. The phase bright phenotype of wildtype spores is partially  
277 attributed to the dipicolinic acid (DPA) content of the spore core. Approximately  $2.5 \times 10^5$  spores  
278 of the *C. difficile* wildtype,  $\Delta sspB_{\text{SNP}}$ , and  $\Delta sspB_{\text{SNP}} psspB$  strains were boiled and the DPA  
279 levels determined by  $\text{Tb}^{3+}$  fluorescence [57]. The DPA content of the *C. difficile*  $\Delta sspB_{\text{SNP}}$  strain  
280 was significantly lower than wildtype content and this was able to be complemented by  
281 expression of the *sspB* gene from its native promoter region (Figure 5I).

282 Because germination assays rely heavily on the release of DPA during germination  
283 (phase bright to phase dark transition), we were unable to use these assays to determine if this  
284 deletion and SNP combination altered germination capabilities [57, 58]. Instead, the spores  
285 were exposed to germinants and the processing of spore proteins during germination were  
286 analyzed by immunoblot. In response to germinants, spores derived from the *C. difficile*  
287  $\Delta sspB_{\text{SNP}}$  strain processed proSleC to its active form, indicating that they are capable of  
288 receiving the germinant signals (Figure 5J) [59-61].

289 Finally, we tested the ability of spores derived from the *C. difficile*  $\Delta sspB_{\text{SNP}} psspB$  strain  
290 to resist UV damage. The *C. difficile*  $\Delta sspB_{\text{SNP}}$  alone was not assessed due to the difficulty in  
291 producing and purifying spores. In the assay, the *C. difficile*  $\Delta sspB_{\text{SNP}} psspB$  strain was  
292 complemented to wildtype levels, revealing that the *sspA*<sub>G52V</sub> allele is not impaired in its ability to  
293 protect against UV damage but SspA may regulate *C. difficile* sporulation with SspB (Figure  
294 5K).

295

296 *C. difficile sspA and sspB are required for spore formation*

297 Due to the G52V mutation in *sspA*, we created a clean *C. difficile*  $\Delta sspA \Delta sspB$  strain to  
298 determine if the double mutant had the same phenotype as the *C. difficile*  $\Delta sspB_{\text{SNP}}$  strain.  
299 Similar to above, the *C. difficile*  $\Delta sspA \Delta sspB$  strain produced phase gray, immature spores

300 (Figure 6A). The rate of sporulation was also 1,000x less than wildtype and could be  
301 complemented with expression of *sspA* and *sspB* from a plasmid (Figure S3). Moreover,  
302 analysis of the DPA content also showed little DPA in the double mutant strain, in comparison to  
303 wildtype (Figure 6B). Finally, to evaluate whether these spores can germinate, we monitored  
304 SleC activation. These double mutant spores also processed proSleC to the active SleC form,  
305 showing that they are still able to germinate (Figure 6C) [59-61]. Again, due to the difficulty in  
306 purifying this strain and despite density gradient purification, spore preparations still contained  
307 debris making it difficult to quantify the spores by microscopy. Therefore, we were forced to use  
308 approximate spore counts. The Coomassie stained SDS PAGE gel shows that more protein is  
309 present in the double mutant sample than in wildtype or the complemented strains, even though  
310 the SleC bands detected by western indicate similar concentrations (Figure S4). This is possibly  
311 due to the presence of contaminating vegetative cells in the double mutant preparation because  
312 of the difficulty in purifying or the spore counts could have been underestimated.

313

314 *C. difficile sspB plays a minor role in UV resistance and does not play a role in outgrowth or*  
315 *chemical resistance*

316 After discovering the SNP in the *C. difficile*  $\Delta$ *sspB* strain, we generated a clean deletion  
317 that produces phase bright, released spores. The *C. difficile*  $\Delta$ *sspB* strain had a sporulation rate  
318 identical to wildtype (Figure S3).

319 Since a clean deletion produces spores, the UV resistance could be determined. Spores  
320 derived from the wildtype *C. difficile* R20291, *C. difficile*  $\Delta$ *sspB* mutant, and *C. difficile*  $\Delta$ *sspB*  
321 *psspB* strains were exposed to UV light for 10 minutes before plating on media with germinants  
322 to determine CFUs. Spores derived from the *C. difficile*  $\Delta$ *sspB* strain had approximately 10% of  
323 the resistance observed for the wildtype strain. This phenotype was complemented by

324 expression of *sspB* from its native promoter *in trans* (Figure 7A). Therefore, *C. difficile* SspB  
325 plays a minor role in UV resistance.

326 Next, we tested the outgrowth of spores derived from the *C. difficile*  $\Delta$ *sspB* strain. Again,  
327 the spores were generated on a minimal medium and the outgrowth was tested in half-strength  
328 complex media supplemented with germinants. Similar to our observations with the  $\Delta$ *sspA*  
329 strain, there was no difference in the outgrowth of spores from the *C. difficile*  $\Delta$ *sspB* strain in  
330 comparison to wildtype spores (Figure 7B).

331 Spores from *C. difficile*  $\Delta$ *sspB* were also tested for chemical resistance in the same  
332 manner as previously discussed. In comparison to *C. difficile* R20291 wildtype spores, *C.*  
333 *difficile*  $\Delta$ *sspB* spores exposed to 3% H<sub>2</sub>O<sub>2</sub>, 75% EtOH, 0.25% glutaraldehyde, 1 M HCl, 0.05%  
334 hypochlorite, 2.5% formaldehyde, and 250 mM nitrous acid did not have reduced viability  
335 (Figure S2A-G).

336

## 337 Discussion

338 *C. difficile* infections occur in individuals with a disrupted microbiota, commonly due to  
339 the use of broad-spectrum antibiotics [1, 4, 5]. Vegetative *C. difficile* colonizes the lower GI tract  
340 and produces toxins that disrupt the epithelial lining integrity and cause colitis and diarrhea [4].  
341 While the toxin producing vegetative cells are eliminated with antibiotic treatment, the spores  
342 can persist in the gut and become vegetative cells again, or they can shed into the environment  
343 [4, 5]. This shedding allows for the transmission of disease by passing spores into an  
344 environment where they can then transfer to other individuals [4, 9]. Spores can withstand  
345 environmental insults, such as UV light, and many chemicals, and persist long term in most  
346 environments [11, 18, 25].

347 UV-B light (between 315 – 280 nm) is the UV wavelength range most responsible for  
348 DNA breaks and DNA lesions (e.g., cyclobutane pyrimidine dimers) [62]. DNA does not absorb  
349 UV-A (400 – 315 nm) but UV-C (less than 280 nm) has high energy and is known to cause  
350 some DNA mutations, but fewer cyclobutane pyrimidine dimers than UV-B [62]. Though *C.*  
351 *difficile* spores are more likely to encounter UV-B from environmental UV radiation, UV-C is  
352 absorbed by ozone making it less likely that spores encounter this spectrum in nature [62].  
353 Several studies have shown that treatment with 254 nm UV light reduced viable *C. difficile* spore  
354 load in the hospital environment [63, 64]. However, this method is not ideal due to the potential  
355 exposure of dangerous UV-C light to individuals implementing this cleaning technique and the  
356 long exposure time of approximately 1 hour. An interesting study evaluated the effects of a  
357 hospital biocide, sodium dichloroisocyanurate (NaDCC), on *C. difficile* spores. In this study, a  
358 10x less lethal concentration of biocide was tested [65]. At this concentration, spores are not  
359 killed as effectively as the lethal concentration and the hydrophobicity of the spores was greatly  
360 reduced (to approximately 20%) [65]. The reduction in hydrophobicity is of concern because it is  
361 possible that spores would spread easier due to reduced adherence to surfaces. This further  
362 perpetuates the problem of trying to clean a *C. difficile* contaminated environment.

363 The small acid-soluble proteins (SASPs) are well established to protect the spores from  
364 environmental insults (e.g., UV light or chemicals) [11, 18, 19, 25]. Here we investigated the  
365 functions of *C. difficile* SASPs in response to UV light and chemicals. We found that *C. difficile*  
366 SspA and SspB have a role in UV resistance but none of the SASPs significantly contribute to  
367 chemical resistances. Surprisingly, we discovered that the deletion of *C. difficile*  $\Delta sspA \Delta sspB$   
368 resulted in phase gray, unreleased spores and we hypothesize that SspA and SspB are working  
369 together to influence sporulation, a SASP function not previously reported.

370 *C. difficile* SASPs are involved in protecting spores from UV exposure. This was not  
371 surprising since the SASPs in all other organisms have had a large role in UV resistance [29,



372 35, 38, 66, 67]. While *B. subtilis*  $\Delta$ *sspB* had almost 100% survival after 3 minutes of exposure to  
373 254 nm UV, *B. subtilis*  $\Delta$ *sspA* spores were sensitive to UV light with only 0.1% survival [35]. In  
374 *C. difficile*, SspA is the major contributor to UV resistance. *C. difficile*  $\Delta$ *sspA* spores exposed to  
375 UV 302 nm light for 10 minutes had 0.1% survival in comparison to *C. difficile*  $\Delta$ *sspB* which had  
376 10% survival; *C. difficile*  $\Delta$ *CDR20291\_1130* and *C. difficile*  $\Delta$ *CDR20291\_3080* did not lose  
377 viability. UV protection is contributed to the binding of the SASPs to the DNA, which changes its  
378 conformation and encourages spore photoproduct mutations over cyclobutane pyrimidine  
379 dimers [19, 25, 39, 41, 44, 46, 54, 68]. The loss of the spore photoproduct repair system, SPL,  
380 interestingly only resulted in a 10x loss of viability. This highlights the importance of SspA in  
381 protecting the genome from lethal UV irradiation. However, in a *C. difficile*  $\Delta$ *sspA*  $\Delta$ *spl* double  
382 mutant, the viability remained the same as for a *C. difficile*  $\Delta$ *sspA* single deletion, suggesting  
383 SspA is the major contributor to UV resistance. This also suggests that SspA primarily  
384 influences the change in DNA structure that encourages spore photoproduct formation upon UV  
385 exposure.

386 In *B. subtilis*, other SASPs than SspA and SspB are considered minor SASPs with many  
387 redundant roles [19, 25, 36]. To evaluate if the *C. difficile* annotated SASPs can compensate for  
388 each other or only minorly contribute to UV resistance, pairwise deletions were generated. The  
389 annotated SASPs do not compensate for each other, as a *C. difficile*  $\Delta$ *CDR20291\_1130*  
390  $\Delta$ *CDR20291\_3080* double deletion does not have a UV defect. A *C. difficile*  $\Delta$ *sspA*  
391  $\Delta$ *CDR20291\_1130* deletion does not further the UV defect from the *C. difficile*  $\Delta$ *sspA* strain  
392 alone. Unexpectedly, whenever the double deletion *C. difficile*  $\Delta$ *sspA*  $\Delta$ *CDR20291\_3080* or the  
393 triple deletion *C. difficile*  $\Delta$ *sspA*  $\Delta$ *CDR20291\_1130*  $\Delta$ *CDR20291\_3080* were tested, they  
394 resulted in 10% viability. We hypothesized that these deletions would result in either the same  
395 defect of 0.1% viability seen with *C. difficile*  $\Delta$ *sspA* alone or that UV sensitivity would be  
396 increased upon more deletions. This increase in survival would suggest that another factor may

397 be compensating for the loss of these SASPs. Another possibility is that the loss of certain  
398 SASPs influences the DNA structure so that UV light affects the strains differently than when  
399 those SASPs are present. However, further work is necessary to determine the cause of the  
400 partial UV resistance with *C. difficile*  $\Delta$ *sspA* and  $\Delta$ *CDR20291\_3080* co-deletions. We also found  
401 that the other 3 *C. difficile* SASPs, *sspB*, *CDR20291\_1130*, and *CDR20291\_3080* are unable to  
402 complement a *C. difficile*  $\Delta$ *sspA* deletion. We hypothesized that this could possibly be due to  
403 differences in expression levels. Indeed, when the *sspA* promoter region was used to drive  
404 expression of the other SASPs, complementation occurred to approximately 5% of wildtype  
405 level. This suggests that the *sspA* promoter region was able to increase expression levels of  
406 these SASPs which in turn led to some protection from UV light in comparison to *C. difficile*  
407  $\Delta$ *sspA* alone. We hypothesize that these other SASPs can bind DNA but need higher  
408 expression to do so.

409 Other analyses revealed that the SASPs *SspA*, *CDR20291\_1130*, and *CDR20291\_3080*  
410 only minorly contribute to outgrowth. A triple mutation was needed before a ~2 hour defect was  
411 observed. We predict that deletion of all three SASPs depletes the amino acid pool and results  
412 in a delay in protein production and outgrowth of the vegetative cell.

413 In other organisms, SASPs play large roles in protection from chemicals. Interestingly,  
414 *C. difficile* SASPs were not important for survival of the spores upon chemical exposure. Nitrous  
415 acid was the only chemical where the SASPs may play a minor role in protection. At 5 minutes  
416 of exposure, *C. difficile*  $\Delta$ *sspA* has approximately 3% of wild type survival and this is  
417 complemented to wildtype levels. At 10 minutes of exposure, *C. difficile*  $\Delta$ *sspA* has 8% of wild  
418 type survival that, again, complements to wildtype levels. Also at 10 minutes, *C. difficile*  
419  $\Delta$ *CDR20291\_1130* survival is 10% of wildtype and *C. difficile*  $\Delta$ *CDR20291\_3080* is 16%; both  
420 could be complemented to wildtype levels. Of note, there were some reductions in spore  
421 survival of some mutants compared to wildtype across the other chemicals tested. However, in

422 these cases complementation plasmids did not restore viability, leading to the conclusion that  
423 some other factor, besides the SASP deletion, was causing the reduced viability. For evaluating  
424 the effect of hypochlorite and glutaraldehyde, reproducibility was an issue. Every trial varied in  
425 response to these chemicals, making it difficult to draw a confident conclusion from these data.  
426 We conclude that *C. difficile* SASPs do not contribute to chemical resistance. This could be due  
427 to protection being evolutionarily unnecessary because *C. difficile* would not typically encounter  
428 many of these chemicals in nature or that the spore coat proteins are better suited to resist  
429 these conditions. Indeed, the *C. difficile* spore coat is established to contain proteins involved in  
430 some resistances [69, 70].

431 In *B. subtilis*, the  $\Delta sspA \Delta sspB$  strain is commonly used to characterize the SASPs. It  
432 was very surprising that the *C. difficile*  $\Delta sspB sspA_{G52V}$  allele ( $sspB_{SNP}$ ) and the *C. difficile*  
433  $\Delta sspA \Delta sspB$  double mutant were unable to form phase bright spores. Based on the phase-  
434 gray cells, we hypothesized that the forespore did not have DPA packaged. Indeed, DPA  
435 content is significantly reduced in these SASP-mutant strains. Because DPA contributes to heat  
436 resistance and heat resistance is a classically tested feature of endospores and used in  
437 sporulation assays, this could have impacted the results of the sporulation assay by killing fully  
438 formed spores that do not package DPA and thus exacerbating the sporulation rate phenotype  
439 [11, 58, 71-73].

440 In the *C. difficile*  $\Delta sspB_{SNP}$  strain, complementation of the spore phenotype only  
441 occurred when *sspB* was driven by a  $\sigma^G$  promoter, indicating the importance of expression at the  
442 correct time and in the correct compartment during sporulation. The use of the *bcla2* promoter  
443 region for  $\sigma^E$  was based off Fimlaid *et al.* However, Saujet *et al.* classified *bcla2* as  $\sigma^K$   
444 dependent [16, 17]. Either way, mother cell specific promoters do not complement the  
445 phenotype, further driving the conclusion that expression must occur in the forespore. This

446 strain could also be complemented by expression of *C. difficile* *sspA*, suggesting that SspA and  
447 SspB may work together.

448 Due to the phenotype, it was very difficult to purify spores from *C. difficile*  $\Delta$ *sspB*<sub>SNP</sub> and  
449 *C. difficile*  $\Delta$ *sspA*  $\Delta$ *sspB*. The spores were treated with lysozyme to digest the mother cell  
450 peptidoglycan and release the phase gray spore. These spores are then less dense, further  
451 complicating the purification process. Because of these difficulties, the spore amounts used in  
452 DPA content assays and immunoblots are rough estimates based on microscope counts. The  
453 Coomassie stained gel shows that more protein was present in the *C. difficile*  $\Delta$ *sspA*  $\Delta$ *sspB*  
454 sample than in the wildtype and the complemented samples even though the immunoblots show  
455 similar levels of protein present. This discrepancy could be due to vegetative cells / debris still  
456 present after purification through a density gradient or it is possible we underestimated the  
457 number of spores in the microscope counts.

458 Furthermore, evaluation of UV viability on the *C. difficile*  $\Delta$ *sspB*<sub>SNP</sub> strain complemented  
459 with *sspB* shows that these spores have approximately 60% of wildtype viability, a large  
460 difference between 0.1% viability in a *C. difficile*  $\Delta$ *sspA* or the 10% viability of the *C. difficile*  
461  $\Delta$ *sspB*. Thus, the *sspA*<sub>G52V</sub> allele does not impair the ability of SspA to protect against UV  
462 damage. Due to the observed phenotypes, we hypothesize that SspA and SspB together  
463 regulate spore formation. Interestingly, the *C. difficile*  $\Delta$ *sspA*  $\Delta$ *sspB* phenotype is similar to the  
464 phenotype of a *C. difficile*  $\Delta$ *spoVT* mutant [17, 74]. In *B. subtilis*, SpoVT is involved in a feed  
465 forward loop to regulate sporulation. While its expression is through  $\sigma^G$ , it works to enhance  
466 some, and repress other,  $\sigma^G$  controlled genes [75]. SpoVT regulates the SASPs, SspA and  
467 SspB, with a mutant having a 30% reduction in these proteins [75]. This mutant strain is still  
468 able to form phase bright spores but they have a reduced sporulation rate [75]. In *C. difficile*, the  
469 *spoVT* mutant has a different phenotype than that observed in *B. subtilis*. This protein is under  
470  $\sigma^G$  regulation and possibly also  $\sigma^F$  [16, 17, 74]. The *C. difficile*  $\Delta$ *spoVT* strain forms immature

471 spores that are phase dark [17]. Similarly to *B. subtilis*, SASP expression was reduced in *C.*  
472 *difficile*; *C. difficile* *sspA* had a 70 fold reduction and *sspB* a 12 fold reduction [17]. The authors  
473 suggested that this SASP reduction was probably not sufficient to explain the phenotype [17].  
474 However, our data suggests that the *C. difficile*  $\Delta$ *spoVT* phenotype may be due to reduced *sspA*  
475 and *sspB* levels. This further highlights the differences in sporulation and SASP function in *C.*  
476 *difficile* compared to the model *B. subtilis* and also furthers our hypothesis of SspA and SspB  
477 regulating spore formation. Furthermore, in the *B. subtilis*  $\Delta$ *sspA*  $\Delta$ *sspB* double mutant,  
478 expression levels of some genes were changed [76]. However, the expression levels suggest  
479 that the SASPs work to negatively regulate multiple forespore genes and even one mother cell  
480 gene [76]. They do note that the changes in transcription may not be due to regulation but to  
481 actual binding of the SASPs to the genome, which represses transcription. The novel finding of  
482 immature spore formation in *C. difficile*  $\Delta$ *sspA*  $\Delta$ *sspB* double mutant suggests that *C. difficile*  
483 SASPs perform a previously unreported function in the sporulation process. This insight will  
484 open new doors for understanding the regulation of sporulation of *C. difficile*.

485

486

487

488

489

## 490 **Materials and Methods**

491 **Bacterial growth conditions:** *C. difficile* strains were grown in a Coy anaerobic chamber at  
492 >4% H<sub>2</sub>, 5% CO<sub>2</sub>, and balanced N<sub>2</sub> at 37 °C in either brain heart infusion supplemented with 5 g  
493 / L yeast extract (BHIS) and 0.1% L-cysteine or tryptone yeast medium with 0.1% thioglycolate

494 [77]. When necessary, media was supplemented with thiamphenicol (10 µg / mL), taurocholate  
495 (TA) (0.1%), anhydrous tetracycline (100 ng / mL), kanamycin (50 µg / mL), or xylose (1%). *E.*  
496 *coli* strains were grown on LB at 37 °C and supplemented with chloramphenicol (20 µg / mL) for  
497 plasmid maintenance. *B. subtilis* BS49 was grown on LB agar or in BHIS broth at 37 °C and  
498 supplemented with 2.5 µg / mL chloramphenicol for plasmid maintenance and 5 µg / mL  
499 tetracycline during conjugations.

500

501 **Plasmid construction:** The *C. difficile* *sspA* targeted CRISPR plasmid was constructed by  
502 amplifying 500 bp upstream and downstream from the *sspA* gene using primer pairs  
503 5'*sspA*\_MTL, 3'*sspA*\_up and 5'*sspA*\_down, 3'*sspA*\_downMTL, respectively. The fragments  
504 were cloned into the *NotI* and *XhoI* site of pKM126 by Gibson assembly [78]. The gRNA was  
505 retargeted to *sspA* by inserting gBlock CRISPR\_ *sspA*\_165 into the *KpnI* and *MluI* sites by  
506 Gibson assembly, generating the pHN05 plasmid. The *spl*, *sspB*, *CDR20291\_1130* and  
507 *CDR20291\_3080* targeting plasmids were similarly constructed. For *spl* plasmid construction, 5'  
508 *spl*\_UP and 3' *spl*\_UP amplified the upstream homology arms and the downstream homology by  
509 5' *spl*\_DN and 3' *spl*\_DN. These were cloned into pKM197 at the *NotI* and *XhoI* sites. The gRNA  
510 was retargeted by cloning into the *KpnI* and *MluI* sites gBlock CRISPR\_ *spl*\_647 resulting in  
511 plasmid pHN61. Primers 5' *sspB* UP and 3' *sspB* UP amplified the upstream region, while  
512 primers 5' *sspB* DN and 3' *sspB* DN amplified the downstream portion. These fragments were  
513 also cloned into pKM126 at the same sites as previously used for homology. The gRNA was  
514 switched with CRISPR\_ *sspB*\_144 at *KpnI* and *MluI* sites, generating pGC05. For  
515 *CDR20291\_1130*, primer pairs 5'*CDR20291\_1130*\_UP, 3' *CDR20291\_1130*\_UP and  
516 5'*CDR20291\_1130*\_DN, 3'*CDR2021\_1130*\_DN were used, respectively, to amplify upstream  
517 and downstream portions of *CDR20291\_1130* homology. For *CDR20291\_3080*, primer pairs  
518 5'*CDR20291\_3080*\_UP, 3' *CDR20291\_3080*\_UP and 5'*CDR20291\_3080*\_DN,

519 3'CDR2021\_3080\_DN were used, respectively, to amplify upstream and downstream portions  
520 of *CDR20291\_3080* homology. These homology arms were cloned by Gibson assembly into  
521 pKM126 [52] at sites *NotI* and *XhoI* [78]. gRNAs CRISPR\_CDR20291\_1130\_114 and  
522 CRISPR\_CDR20291\_3080\_184 were cloned into the plasmids at the *KpnI* and *MluI* sites. Next,  
523 because of issues with the *tet* promoter (in pKM126) causing leaky expression of *cas9*, and  
524 causing potential problems during conjugation, *tetR* was replaced with *xyIR* from pIA33 [79].  
525 The *xyIR* region was amplified with primers 5' sspB.xyIR and 3'cas9\_Pxyl2 for sspB plasmid,  
526 5'CD1130\_HR\_xyIR and 3'cas9\_Pxyl2 for the CDR20291\_1130 plasmid and the primers  
527 5'CD3080\_HR\_xyIR and 3'cas9\_Pxyl2 for the CDR20291\_3080 plasmid to create pHN101,  
528 targeting *sspB*, pHN32, targeting *CDR20291\_1130*, and pHN34, targeting *CDR20291\_3080*.

529 For *C. difficile*  $\Delta$ *sspA* complementation plasmids, the genes and promoter regions were  
530 inserted by Gibson assembly into the *NotI* and *XhoI* sites of pJS116 [53] by Gibson assembly  
531 [78]. The *sspA* gene plus 500 bp upstream was amplified using primer pair 5'sspA\_MTL and 3'  
532 sspA.pJS116 to create plasmid pHN11. The vector, pHN14, consisting of the *sspB* gene and  
533 500 bp upstream was generated using primers 5' sspB UP and 3'sspBpJS116. The *sspA*  
534 portion of the *sspA* and *sspB* double mutant complementation vector, pHN30, was amplified  
535 with 5'sspApJS116 and 3' sspAsspB. The *sspB* portion of the double mutant complement was  
536 amplified with 5' sspAsspB and 3' sspBpJS116. For pHN84, the *sspA* complement with a 6x  
537 histidine tag on the C-terminus, the primers 5'sspA\_MTL and 3' sspA.His\_pJS116 were used.  
538 The primers 5' sspB UP with 3' PsspB\_sspA and 5' PsspB\_sspA with 3' sspA.pJS116 were  
539 used to generate a plasmid with 500 bp upstream of the *sspB* gene driving expression of the  
540 *sspA* gene for pHN91. The 500 bp upstream of *sspA* was amplified with 5'sspA\_MTL and  
541 3'sspB\_sspA and used to drive expression of the *sspB* gene, amplified with 5'sspB\_sspA and  
542 3'sspBpJS116 for the pHN83 complementation vector. To generate the pHN56 vector of the  
543 *CDR20291\_1130* gene and 500 bp upstream, the primer pair 5' 1130comp and 3' 1130comp

544 were used. For amplification of the *CDR20291\_3080* gene and 500 bp upstream, pHN57, the  
545 primers 5' 3080comp and 3' 3080comp were used. Generation of 500 bp upstream of *sspA* was  
546 amplified with primers 5'sspA\_MTL and 3' sspA\_CD1130 and used to drive expression of the  
547 *CDR20291\_1130* gene amplified with primers 5' CD1130\_sspA and 3' 1130comp for plasmid  
548 pHN96. The plasmid pHN97 was generated with 500 bp upstream of *sspA*, with primers  
549 5'sspA\_MTL and 3' sspA\_CD3080 and the *CDR20291\_3080* gene amplified with 5'  
550 CD3080\_sspA and 3' 3080comp. For the negative control, pHN109, of *mCherry* driven by *sspA*  
551 promoter region, the *sspA* promoter region was amplified with primers 5'sspA\_MTL and 3'  
552 PsspA.mCherry, while the *mCherry* gene was amplified from pRAN473 [80] with primers 5'  
553 PsspA.mCherry and 3' mCherry.PsspA. Another negative control of just the *sspA* promoter  
554 region, pHN102, was generated by using 5'sspA\_MTL and 3' PsspA.pJS116 to amplify the *sspA*  
555 promoter region. To generate the  $\sigma^E$ \_sspB plasmid, the promoter region of *bclA2* was amplified  
556 with 5' sigE.bclA2\_pJS116 and 3' sigE.bclA2\_sspB and the *sspB* gene with 5' sigE.bclA2\_sspB  
557 and 3' sspB\_pJS116, creating pHN80. For the  $\sigma^K$ \_sspB complement vector, the promoter region  
558 of *sleC* was amplified with 5' pJS116\_sigK and 3' sigK\_sspB and the *sspB* gene with 5'  
559 sigK\_sspB and 3'sspB\_pJS116, generating pHN49. The promoter region of *gpr* was amplified  
560 with 5' pJS116\_sigF and 3' sigF\_sspB and the *sspB* gene with 5' sigF\_sspB and 3'  
561 sspB\_pJS116 to generate the  $\sigma^F$ \_sspB plasmid, pHN47. All plasmid sequences were confirmed  
562 by DNA sequencing. Cloning was done in *E. coli* DH5 $\alpha$ . A complete list of oligonucleotides used  
563 and the strains and plasmids generated can be found in Tables S1 and S2, respectively.

564

565 **Conjugations:** The resulting plasmids, pGC05, pHN05, pHN61, pHN101, pHN32, and pHN34  
566 were conjugated separately into *C. difficile* R20291 using *B. subtilis* BS49 as a conjugal donor,  
567 as described previously [52]. Briefly, 0.25 mL of *C. difficile* R20291 overnight culture was back  
568 diluted into 4.75 mL fresh BHIS and incubated for 4 hours. Meanwhile, 5 mL of BHIS



569 supplemented with chloramphenicol and tetracycline was inoculated with 1 colony of *B. subtilis*  
570 BS49 containing the plasmid and was incubated at 37 °C for 3 hours. After incubation, the *B.*  
571 *subtilis* culture was passed into the anaerobic chamber and 100 µL culture was plated on TY  
572 agar medium, along with 100 µL of *C. difficile* R20291. This was incubated for approximately 24  
573 hours. Growth was then suspended in 1.5 mL of BHIS and plated onto BHIS agar supplemented  
574 with thiamphenicol and kanamycin for selection. Resulting transconjugant colonies were  
575 streaked, twice, onto BHIS supplemented with thiamphenicol and kanamycin (TK) or BHIS  
576 supplemented with tetracycline (to screen for the conjugal transfer of the *Tn916* transposon).  
577 Thiamphenicol resistant and tetracycline sensitive colonies were tested by PCR for plasmid  
578 components.

579

580 **CRISPR induction:** Overnight cultures of 5 mL TY medium supplemented with thiamphenicol  
581 were inoculated with one colony of a *C. difficile* R20291 strain containing a CRISPR  
582 mutagenesis plasmid with *tet*-driven *cas9* (pGC05 and pHN05). After approximately 16 hours of  
583 growth, 0.25 mL of overnight culture was back diluted with 4.75 mL TY broth and supplemented  
584 with thiamphenicol and anhydrous tetracycline and incubated for 6 hours [52]. A loopful  
585 (approximately 10 µL) of culture was plated onto BHIS and the individual colonies were tested  
586 by PCR for the mutation. Once PCR confirmed, the plasmid was cured by passaging onto BHIS  
587 plates. For induction of *xyI*-driven *cas9* plasmids (pHN61, pHN101, pHN32 and pHN34),  
588 colonies were passaged 3 times on TY agar supplemented with 1% xylose and thiamphenicol.  
589 Mutants were detected by PCR and the plasmid was cured by passaging in BHIS broth  
590 supplemented with 0.5% xylose. Pairwise mutants were generated by conjugating the  
591 appropriate plasmid into the necessary mutant strain and inducing as described above.

592

593 **Spore Purification:** Cultures were plated onto 70:30 media or CDMM minimal media where  
594 indicated and incubated 5 days. Spores were purified as previously described [53, 57, 58, 81].  
595 Briefly, plates were scraped and contents suspended in dH<sub>2</sub>O overnight at 4 °C. The pellets  
596 were resuspended then centrifuged at max speed. The upper, fluffy-white, layer was removed  
597 and resuspended again in dH<sub>2</sub>O. This process was repeated approximately 5 times. The spores  
598 were then separated by density gradient in 50% sucrose solution at 3,500 xg for 20 minutes.  
599 The spore pellet was washed approximately 5 times in dH<sub>2</sub>O. The spores were stored at 4 °C  
600 until use.

601 To purify the  $\Delta sspB_{SNP}$  and the  $\Delta sspA \Delta sspB$  double mutant spores, the pellets were scraped  
602 into dH<sub>2</sub>O and left overnight at 4 °C. The pellets were then resuspended with 1 µg of lysozyme  
603 and incubated for 4 hours at 37 °C. The suspension was centrifuged at max speed for 1 minute  
604 and the upper phase removed, and the pellet resuspended with dH<sub>2</sub>O. This process was  
605 repeated approximately 5 times before 5 mL of spores were layered onto a HistoDenz gradient  
606 of 10 mL of 50% and 10 mL of 25%. This was centrifuged 30 minutes at 18,900 xg at 4 °C. The  
607 pellet was then washed approximately 5 times in dH<sub>2</sub>O and stored at 4°C until use.

608

609 **Germination assay and DPA content:** Germination was monitored using a Spectramax M3  
610 plate reader (Molecular Devices, Sunnyvale, CA). 5 µL of OD<sub>600</sub> = 100 spores were added to 95  
611 µL germination buffer consisting of a final concentration 1x HEPES, 30 mM glycine, 10 mM TA  
612 and the OD<sub>600</sub> was monitored for 1 hour at 37 °C. To assay total DPA content, 1 x 10<sup>6</sup> spores in  
613 20 µL, were boiled at 95 °C for 20 minutes. 5 µL (an equivalent of 2.5 x 10<sup>5</sup> spores) of the  
614 solution was added to 95 µL of 1X HEPES buffer with 250 µM TbCl<sub>3</sub> and analyzed by excitation  
615 at 275 nm and emission at 545 nm with a 420 nm cutoff [56, 57, 61, 72, 82].

616

617 **Western blotting:** For the  $\Delta sspB_{SNP}$  strain, approximately  $1 \times 10^7$  spores were incubated for 1  
618 hour in 50  $\mu$ L of BHIS with or without 10 mM TA at 37 °C. The solutions were boiled for 20  
619 minutes in 2x NuPAGE buffer at 95 °C. 10  $\mu$ L (equivalent to approximately  $1 \times 10^6$  spores) of  
620 each solution was separated on a 15% SDS PAGE gel. For the double mutant strain,  $\Delta sspA$   
621  $\Delta sspB$ , approximately  $4-8 \times 10^4$  total spores were separated. The protein was transferred to  
622 polyvinylidene difluoride (PVDF) membranes at 0.75 amps for 1.5 hours for the  $\Delta sspB_{SNP}$  strain  
623 and at 1 amp for 30 minutes for the  $\Delta sspA \Delta sspB$  strain. The membranes were blocked  
624 overnight in 5% milk in TBST. The following day, the membranes were washed 3 times, 15  
625 minutes each, at room temperature. SleC anti-sera was added to 5% milk in TBST at a 1:20,000  
626 dilution for 1 hour. The membranes were washed again, as above. The anti-rabbit secondary  
627 antibody was diluted to 1:20,000 in 5% milk in TBST and incubated for 1 hour. The membranes  
628 were again washed, as above. The membranes were incubated with Pierce ECL Western  
629 Blotting Substrate (ThermoScientific) for 1 minute and then x-ray film was exposed and  
630 developed.

631

632 **Phase contrast imaging:** Strains were plated onto 70:30 (70% SMC medium and 30% BHIS  
633 medium) sporulation media and incubated for 6 days. After the incubation period, the growth  
634 was harvested and suspended in fixative (4% formaldehyde, 2% glutaraldehyde in 1x PBS). The  
635 samples were imaged on a Leica DM6B microscope at the Texas A&M University Microscopy  
636 Imaging Center.

637

638 **Sporulation:** Sporulation assays were completed as previously described [73]. Briefly, three  
639 70:30 plates were inoculated with fresh colonies of the indicated strains. These were grown for  
640 48 hours before half of the plate was harvested into 600  $\mu$ L of pre-reduced PBS solution and the

641 pellets resuspended. 300  $\mu$ L of suspension was removed from the chamber and heated for 30  
642 minutes at 65 °C and mixed every 10 minutes by inversion. After heating, these samples were  
643 passed into the anaerobic chamber for enumeration. Both the heat-treated and the remaining  
644 300  $\mu$ L of untreated suspension was serially diluted and plated in technical triplicates of 4.5  $\mu$ L  
645 spots on rich, BHIS, medium supplemented with 0.1% TA. After 22 hours of growth, the CFUs  
646 were enumerated. The ratios of treated to untreated were calculated and then the efficiency of  
647 sporulation determined in comparison to the wildtype strain. The experiment was performed in  
648 biological triplicate.

649

650 **UV exposure:** The 302 nm UV lamp (Fisher Scientific) was allowed to warm-up for 20 minutes  
651 before UV exposure. Spores were diluted in PBS to  $1 \times 10^7$  spores / mL. A sample was  
652 collected at  $T_0$  for initial, untreated, spore calculations. 1 mL of a spore solution was added to a  
653 miniature glass (UV penetrable) petri dish. These dishes were placed under the UV lamp and  
654 exposed with constant agitation for the indicated time. After exposure, the untreated and treated  
655 samples were serially diluted then introduced into the anaerobic chamber where they were  
656 plated onto BHIS medium supplemented with taurocholic acid and thiamphenicol, for plasmid  
657 maintenance. After 48 hours of incubation, the CFUs were enumerated. Treated spore counts  
658 were normalized to untreated and then this ratio was normalized to the ratio for wildtype spores.

659

660 **Outgrowth:** Outgrowth, post-germination, was performed in half-strength BHIS supplemented  
661 with 30 mM glycine and 10 mM taurocholic acid. Thiamphenicol was supplemented where  
662 necessary to maintain plasmids. Spores were added to an  $OD_{600}$  of 0.05 and the  $OD_{600}$  was  
663 recorded over time.

664

665 **Chemical resistance:**  $1 \times 10^7$  spores were suspended in PBS with the indicated chemical  
666 concentration for various exposure times. The exposed spores were immediately serially diluted  
667 into PBS tubes and plated onto rich media supplemented with taurocholate. For generation of  
668 nitrous acid, a one to one volume of 1 M sodium acetate, pH 4.5 and 1 M sodium nitrite were  
669 combined and incubated for at least 30 minutes before spore exposure. For formaldehyde  
670 exposure, the exposed solution was serially diluted into PBS with 400 mM glycine and  
671 incubated for at least 20 minutes to quench the formaldehyde before plating.

672

673

674

675

676

677

678

679

680

681

682

### 683 **Figure Legends**

684 **Figure 1. SASP homology.** Alignment of *B. subtilis* SspA with *C. difficile* SspA, SspB,  
685 CDR20291\_1130 and CDR20291\_3080. The site of GPR cleavage is indicated. Also illustrated  
686 is the site of insertion in Clostridial Ssp proteins.

687

688

689 **Figure 2. *C. difficile* sspA is necessary for UV protection.** Spores were exposed to 302 nm  
690 UV light for 10 minutes. After exposure, they were serially diluted and plated onto rich medium  
691 supplemented with germinants and CFUs were enumerated. All data was normalized to  $T_0$  then  
692 the ratio of the mutants was normalized to the ratio of wildtype. A.) Spores derived from wild  
693 type R20291 with the indicated deletion strains. B.) spores derived from pairwise deletions of *C.*  
694 *difficile*  $\Delta$ sspA,  $\Delta$ CDR20291\_1130, and  $\Delta$ CDR20291\_3080. pEV indicates an empty vector.

695 All data points represent the average from three independent experiments. Statistical analysis  
696 was performed by one way ANOVA with Dunnett's multiple comparisons test in comparison to  
697 wildtype. \*  $P < 0.01$ , \*\*  $P < 0.0001$

698

699 **Figure 3. Complementation of the *C. difficile*  $\Delta$ sspA strain.** A) Spores derived from wildtype  
700 *C. difficile* R20291 pEV ●, the *C. difficile*  $\Delta$ sspA pEV deletion strain □, and the *C. difficile*  $\Delta$ sspA  
701 psspA strain ■ were exposed to UV for varying times and the viability assessed by normalizing  
702 to  $T_0$ . B) Spores from the *C. difficile*  $\Delta$ sspA mutant strain containing genes under control of the  
703 sspA promoter were exposed to 302 nm UV light for 10 minutes. After exposure, the spores  
704 were serially diluted and plated onto rich medium supplemented with germinants. The CFUs  
705 were enumerated and then normalized to  $T_0$  CFUs. The ratio of the complemented *C. difficile*  
706  $\Delta$ sspA mutant strains were normalized to the ratio of the wildtype strain. C) Spores from the *C.*  
707 *difficile*  $\Delta$ sspA mutant strain containing genes under the control of the sspA or sspB promoter  
708 regions were exposed to UV for 10 minutes. pEV indicates an empty vector.

709 All data represents the average of three independent experiments. Statistical analysis was  
710 performed by ANOVA with Dunnett's multiple comparison. A) two way, in comparison to  
711 wildtype, B) and C) one way, in comparison to *C. difficile*  $\Delta$ sspA pEV. \* P<0.05, \*\* P<0.0001.

712

713 **Figure 4. *C. difficile*  $\Delta$ sspA  $\Delta$ CDR20291\_1130  $\Delta$ CDR20291\_3080 affects spore outgrowth.**

714 Outgrowth was determined by monitoring the OD<sub>600</sub> of spores inoculated into half-strength  
715 complex medium supplemented with germinants (10 mM taurocholic acid and 30 mM glycine).  
716 All spores used for outgrowth were generated on minimal medium. A) Outgrowth of of *C. difficile*  
717 R20291 pEV ●, *C. difficile*  $\Delta$ sspA pEV □ and *C. difficile*  $\Delta$ CDR20291\_1130  $\Delta$ CDR20291\_3080  
718 pEV Δ. B) Outgrowth of wildtype R20291 pEV ● and triple mutant spores of *C. difficile*  $\Delta$ sspA  
719  $\Delta$ CDR20291\_1130  $\Delta$ CDR20291\_3080 pEV ▼. C) Spore germination was monitored at OD<sub>600</sub>  
720 upon exposure of spores to germinants taurocholic acid and glycine in a buffered solution. The  
721 OD<sub>600</sub> was normalized to T<sub>0</sub>. R20291 pEV ● and triple mutant spores of *C. difficile*  $\Delta$ sspA  
722  $\Delta$ CDR20291\_1130  $\Delta$ CDR20291\_3080 pEV ▼. pEV indicates an empty vector.

723 All data points represent the average from three independent experiments. Statistical analysis  
724 by two way ANOVA with Dunnett's multiple comparisons test. A) *C. difficile*  $\Delta$ sspA, P<0.001 at  
725 11 minutes.

726

727 **Figure 5. *C. difficile*  $\Delta$ sspB<sub>SNP</sub> results in phase gray engulfed spores. A-H) Day 6 cultures**

728 of the indicated strains were fixed in 4% formaldehyde and 2% glutaraldehyde before imaging  
729 on a Leice DM6B microscope. I) DPA content was determined by boiling spore solutions and  
730 analyzing approximately 2.5 x 10<sup>5</sup> spores by terbium florescence. J) Western blot of spores  
731 exposed to 10 mM taurocholic acid in a rich medium for 1 hour and blotted against SleC. ←  
732 indicates processed SleC. K) Spores were exposed to 302 nm UV light for 10 minutes before

733 serial dilution and plating on rich medium supplemented with germination. All values were  
734 normalized to  $T_0$  and then those ratios were normalized to the ratio of wildtype survival. pEV  
735 indicates an empty vector.

736 All data points represent the average from three independent experiments. I) Statistical analysis  
737 by one way ANOVA with Dunnetts multiple comparisons test. K) Statistical analysis by unpaired  
738 t test. \*  $P < 0.05$ , \*\*  $P < 0.01$ , \*\*\*  $P < 0.001$ .

739

740 **Figure 6. Phenotypic characterization of *C. difficile*  $\Delta$ sspA  $\Delta$ sspB double mutant.** A) Day  
741 6 cultures were fixed in 4% formaldehyde and 2% glutaraldehyde before imaging on a Leica  
742 DM6B microscope. B) DPA content was determined by boiling spore solutions and analyzing  
743 approximately  $2.5 \times 10^5$  spores by terbium florescence. C) Western blot of spores exposed to 10  
744 mM taurocholic acid in a rich medium for 1 hour and blotted against SleC. ← indicates the  
745 cleaved SleC band. pEV indicates an empty vector.

746 Data represents the average of three independent experiments. Statistical analysis was  
747 performed by one way ANOVA with Dunnett's multiple comparison test. \*  $P < 0.01$ .

748

749 **Figure 7. *C. difficile*  $\Delta$ sspB has a minor UV defect and no role in outgrowth.** A) Spores  
750 derived from *C. difficile* R20291 pEV, *C. difficile*  $\Delta$ sspB with pEV, and *C. difficile*  $\Delta$ sspB psspB  
751 were exposed to UV light for 10 minutes. The spores were serially diluted and plated onto  
752 medium containing germinants. Strains were normalized to CFUs at  $T_0$ . The ratios were then  
753 normalized to the ratio of wildtype survival. B) Outgrowth of spores from *C. difficile* R20291 pEV  
754 ● and *C. difficile*  $\Delta$ sspB pEV ◇ was monitored at  $OD_{600}$  over 12 hours. Starting OD was 0.05 into  
755 half-strengthed complex medium supplemented with germinants. pEV indicates an empty  
756 vector.



757 All data represents the average of three independent experiments. A) Statistical analysis by one  
758 way ANOVA with Dunnett's multiple comparison test. \*  $P < 0.001$ . B) Statistical analysis by two  
759 way ANOVA with Dunnett's multiple comparison test,  $P < 0.0001$  at 10 hours.

760

761 **Acknowledgments.** We thank Ge Chen for the construction of the pGC05 plasmid and  
762 members of the Sorg laboratory for critical comments during preparation of this manuscript.  
763 This project was supported by awards R01AI116895 and U01AI124290 from the National  
764 Institute of Allergy and Infectious Diseases. The content is solely the responsibility of the  
765 authors and does not necessarily represent the official views of the NIAID. The funders had no  
766 role in study design, data collection and interpretation, or the decision to submit the work for  
767 publication.

768

769

770

## 771 **References**

- 772 1. Lessa FC, Mu Y, Bamberg WM, Beldavs ZG, Dumyati GK, Dunn JR, et al. Burden of  
773 *Clostridium difficile* infection in the United States. N Engl J Med. 2015;372(9):825-34. Epub  
774 2015/02/26. doi: 10.1056/NEJMoa1408913. PubMed PMID: 25714160.
- 775 2. McDonald LC, Gerding DN, Johnson S, Bakken JS, Carroll KC, Coffin SE, et al. Clinical  
776 practice guidelines for *Clostridium difficile* infection in adults and children: 2017 update by the  
777 Infectious Diseases Society of America (IDSA) and Society for Healthcare Epidemiology of  
778 America (SHEA). Clin Infect Dis. 2018;66(7):e1-e48. Epub 2018/02/21. doi:  
779 10.1093/cid/cix1085. PubMed PMID: 29462280; PubMed Central PMCID: PMC6018983.
- 780 3. CDC. Antibiotic Resistance Threats in the United States. In: Services USDoHaH, editor.  
781 Atlanta, GA2019.
- 782 4. Smits WK, Lyras D, Lacy DB, Wilcox MH, Kuijper EJ. *Clostridium difficile* infection.  
783 Nature Reviews Disease Primers. 2016;2:16021. doi: 10.1038/nrdp.2016.21.
- 784 5. Seekatz AM, Young VB. *Clostridium difficile* and the microbiota. J Clin Invest.  
785 2014;124(10):4182-9. Epub 2014/07/19. doi: 10.1172/JCI72336. PubMed PMID: 25036699;  
786 PubMed Central PMCID: PMC4191019.

- 787 6. Tran MN, Kullar R, Goldstein EJC. Investigational drug therapies currently in early-stage  
788 clinical development for the treatment of *Clostridioides (clostridium) difficile* infection. *Expert*  
789 *Opin Investig Drugs*. 2019:1-13. Epub 2019/02/13. doi: 10.1080/13543784.2019.1581763.  
790 PubMed PMID: 30753786.
- 791 7. Allen CA, Babakhani F, Sears P, Nguyen L, Sorg JA. Both fidaxomicin and vancomycin  
792 inhibit outgrowth of *Clostridium difficile* spores. *Antimicrob Agents Chemother*. 2013;57(1):664-  
793 7. Epub 2012/11/14. doi: 10.1128/AAC.01611-12. PubMed PMID: 23147724; PubMed Central  
794 PMCID: PMC3535933.
- 795 8. Fekety R, Kim K, Brown D, Batts DH, Cudmore M, Silva Jr. J. Epidemiology of antibiotic-  
796 associated colitis *American Journal of Medicine* 1981.
- 797 9. Lawley TD, Clare S, Walker AW, Goulding D, Stabler RA, Croucher N, et al. Antibiotic  
798 treatment of *Clostridium difficile* carrier mice triggers a supershedder state, spore-mediated  
799 transmission, and severe disease in immunocompromised hosts. *Infect Immun*.  
800 2009;77(9):3661-9. Epub 2009/07/01. doi: 10.1128/IAI.00558-09. PubMed PMID: 19564382;  
801 PubMed Central PMCID: PMC2737984.
- 802 10. Deakin LJ, Clare S, Fagan RP, Dawson LF, Pickard DJ, West MR, et al. The *Clostridium*  
803 *difficile* *spo0A* gene is a persistence and transmission factor. *Infect Immun*. 2012;80(8):2704-11.  
804 Epub 2012/05/23. doi: 10.1128/IAI.00147-12. PubMed PMID: 22615253; PubMed Central  
805 PMCID: PMC3434595.
- 806 11. Setlow P. Spore resistance properties *Microbiology Spectrum* 2014. doi:  
807 10.1128/microbiolspec.
- 808 12. Talukdar PK, Olguin-Araneda V, Alnoman M, Paredes-Sabja D, Sarker MR. Updates on  
809 the sporulation process in *Clostridium* species. *Res Microbiol*. 2015;166(4):225-35. Epub  
810 2014/12/30. doi: 10.1016/j.resmic.2014.12.001. PubMed PMID: 25541348.
- 811 13. de Hoon MJ, Eichenberger P, Vitkup D. Hierarchical evolution of the bacterial  
812 sporulation network. *Curr Biol*. 2010;20(17):R735-45. Epub 2010/09/14. doi:  
813 10.1016/j.cub.2010.06.031. PubMed PMID: 20833318; PubMed Central PMCID:  
814 PMC32944226.
- 815 14. Hoch JA. Regulation of the phosphorelay and the initiation of sporulation in *Bacillus*  
816 *subtilis* *ann Rev Microbiol*. 1993;47:441-65.
- 817 15. Paredes-Sabja D, Shen A, Sorg JA. *Clostridium difficile* spore biology: sporulation,  
818 germination, and spore structural proteins. *Trends Microbiol*. 2014;22(7):406-16. Epub  
819 2014/05/13. doi: 10.1016/j.tim.2014.04.003. PubMed PMID: 24814671; PubMed Central  
820 PMCID: PMC4098856.
- 821 16. Fimlaid KA, Bond JP, Schutz KC, Putnam EE, Leung JM, Lawley TD, et al. Global  
822 analysis of the sporulation pathway of *Clostridium difficile*. *PLoS Genet*. 2013;9(8):e1003660.  
823 Epub 2013/08/21. doi: 10.1371/journal.pgen.1003660. PubMed PMID: 23950727; PubMed  
824 Central PMCID: PMC3738446.
- 825 17. Saujet L, Pereira FC, Serrano M, Soutourina O, Monot M, Shelyakin PV, et al. Genome-  
826 wide analysis of cell type-specific gene transcription during spore formation in *Clostridium*  
827 *difficile*. *PLoS Genet*. 2013;9(10):e1003756. Epub 2013/10/08. doi:  
828 10.1371/journal.pgen.1003756. PubMed PMID: 24098137; PubMed Central PMCID:  
829 PMC3789822.
- 830 18. Setlow P. Spores of *Bacillus subtilis*: their resistance to and killing by radiation, heat and  
831 chemicals. *J Appl Microbiol*. 2006;101(3):514-25. Epub 2006/08/16. doi: 10.1111/j.1365-  
832 2672.2005.02736.x. PubMed PMID: 16907802.
- 833 19. Setlow P. Small, acid-soluble spore proteins of *Bacillus* species: structure, synthesis,  
834 genetics, function, and degradation. *Ann Rev Microbiol* 1988;42.
- 835 20. Cabrera-Martinez RM, Mason JM, Setlow B, Waites WM, Setlow P. Purification and  
836 amino acid sequence of two small, acid-soluble proteins from *Clostridium bifermentans* spores.  
837 *FEMS Microbiology Letters*. 1989.

- 838 21. Cabrera-Martinez RM, Setlow P. Cloning and nucleotide sequence of three genes  
839 coding for small, acid-soluble proteins of *Clostridium perfringens* spores. FEMS Microbiology  
840 Letters. 1991.
- 841 22. Cabrera-Hernandez A, Setlow P. Analysis of the regulation and function of five genes  
842 encoding small, acid-soluble spore proteins of *Bacillus subtilis*. Gene 2000;248:169-81.
- 843 23. Li J, McClane BA. A novel small acid soluble protein variant is important for spore  
844 resistance of most *Clostridium perfringens* food poisoning isolates. PLoS Pathog.  
845 2008;4(5):e1000056. Epub 2008/05/03. doi: 10.1371/journal.ppat.1000056. PubMed PMID:  
846 18451983; PubMed Central PMCID: PMCPMC2323104.
- 847 24. Hackett RH, Setlow P. Properties of spores of *Bacillus subtilis* strains which lack the  
848 major small, acid-soluble protein. J Bacteriol. 1988;170(3):1403-4.
- 849 25. Setlow P. I will survive: DNA protection in bacterial spores. Trends Microbiol.  
850 2007;15(4):172-80. Epub 2007/03/06. doi: 10.1016/j.tim.2007.02.004. PubMed PMID:  
851 17336071.
- 852 26. Li J, Paredes-Sabja D, Sarker MR, McClane BA. Further characterization of *Clostridium*  
853 *perfringens* small acid soluble protein-4 (Ssp4) properties and expression. PLoS One.  
854 2009;4(7):e6249. Epub 2009/07/18. doi: 10.1371/journal.pone.0006249. PubMed PMID:  
855 19609432; PubMed Central PMCID: PMCPMC2706996.
- 856 27. Setlow B, Setlow P. Binding of small, acid-soluble spore proteins to DNA plays a  
857 significant role in the resistance of *Bacillus subtilis* spores to hydrogen peroxide. Appl Environ  
858 Microbiol. 1993;59(10):3418-23.
- 859 28. Meaney CA, Cartman ST, McClure PJ, Minton NP. The role of small acid-soluble  
860 proteins (SASPs) in protection of spores of *Clostridium botulinum* against nitrous acid. Int J  
861 Food Microbiol. 2016;216:25-30. Epub 2015/09/20. doi: 10.1016/j.ijfoodmicro.2015.08.024.  
862 PubMed PMID: 26386202.
- 863 29. Paredes-Sabja D, Raju D, Torres JA, Sarker MR. Role of small, acid-soluble spore  
864 proteins in the resistance of *Clostridium perfringens* spores to chemicals. Int J Food Microbiol.  
865 2008;122(3):333-5. Epub 2008/01/29. doi: 10.1016/j.ijfoodmicro.2007.12.006. PubMed PMID:  
866 18221812.
- 867 30. Loshon CA, Genest PC, Setlow B, P. S. Formaldehyde kills spores of *Bacillus subtilis* by  
868 DNA damage and small, acid-soluble spore proteins of the a/b type protect spores against this  
869 DNA damage. J Appl Microbiol. 1999;87:8-14.
- 870 31. Leyva-Illades JF, Setlow B, Sarker MR, Setlow P. Effect of a small, acid-soluble spore  
871 protein from *Clostridium perfringens* on the resistance properties of *Bacillus subtilis* spores. J  
872 Bacteriol. 2007;189(21):7927-31. Epub 2007/09/04. doi: 10.1128/JB.01179-07. PubMed PMID:  
873 17766414; PubMed Central PMCID: PMCPMC2168745.
- 874 32. Setlow P. Mechanisms for the prevention of damage to DNA in spores of *Bacillus*  
875 species ann Rev Microbiol. 1995;49:29-54.
- 876 33. Espitia LdCH, Caley C, Bagyan I, Setlow P. Base-change mutations induced by various  
877 treatments of *Bacillus subtilis* spores with and without DNA protective small, acid-soluble spore  
878 proteins. Mutation Research. 2002;503:77-84.
- 879 34. R. Tennen BS, K.L. Davis, C.A. Loshon and P. Setlow. Mechanisms of killing of spores  
880 of *Bacillus subtilis* by iodine, glutaraldehyde and nitrous acid. J Appl Microbiol. 2000;89:330-8.
- 881 35. Mason J, Setlow P. . Essential role of small, acid-soluble spore proteins in resistance of  
882 *Bacillus subtilis* spores to UV light. Journal of Bacteriology 1986;167:174-8.
- 883 36. Mason J, Setlow P. Different small, acid-soluble proteins of the a/b type have  
884 interchangeable roles in the heat and UV radiation resistance of *Bacillus subtilis* spores. J  
885 Bacteriol. 1987;169(8):3633-7.
- 886 37. Raju D, Waters M, Setlow P, Sarker MR. Investigating the role of small, acid-soluble  
887 spore proteins (SASPs) in the resistance of *Clostridium perfringens* spores to heat. BMC

- 888 Microbiol. 2006;6:50. Epub 2006/06/09. doi: 10.1186/1471-2180-6-50. PubMed PMID:  
889 16759397; PubMed Central PMCID: PMCPMC1501028.
- 890 38. Raju D, Setlow P, Sarker MR. Antisense-RNA-mediated decreased synthesis of small,  
891 acid-soluble spore proteins leads to decreased resistance of *Clostridium perfringens* spores to  
892 moist heat and UV radiation. Appl Environ Microbiol. 2007;73(7):2048-53. Epub 2007/01/30. doi:  
893 10.1128/AEM.02500-06. PubMed PMID: 17259355; PubMed Central PMCID:  
894 PMCPMC1855649.
- 895 39. Setlow B, Sun D, Setlow P. Interaction between DNA and a/b-type small, acid-soluble  
896 spore proteins: a new class of DNA-binding protein. J Bacteriol. 1992.
- 897 40. Wetzel D, Fischer RJ. Small acid-soluble spore proteins of *Clostridium acetobutylicum*  
898 are able to protect DNA in vitro and are specifically cleaved by germination protease GPR and  
899 spore protease YyaC. Microbiology. 2015;161(11):2098-109. Epub 2015/09/13. doi:  
900 10.1099/mic.0.000162. PubMed PMID: 26362088.
- 901 41. Ki Seog Lee DB, Jeffrey Kosman, Peter Setlow, and Mark J. Jedrzejas. Structure of a  
902 protein-DNA complex essential for DNA protection in spores of *Bacillus* species. PNAS.  
903 2007;105(8).
- 904 42. Griffith J, Makhov A, Santiago-Larat L, Setlow P. Electron microscopic studies of the  
905 interaction between a *Bacillus subtilis* a/b-type small, acid-soluble spore protein with DNA:  
906 protein binding is cooperative, stiffens the DNA, and induces negative supercoiling. Proc Natl  
907 Acad Sci. 1994;91:8224-8.
- 908 43. Mohr SC, Sokolov NVHA, He C, Setlow P. Binding of small acid-soluble spore proteins  
909 from *Bacillus subtilis* changes the conformation of DNA from B to A. Proc Natl Acad Sci.  
910 1991;88:77-81.
- 911 44. Yang L, Li L. Spore photoproduct lyase: the known, the controversial, and the unknown.  
912 J Biol Chem. 2015;290(7):4003-9. Epub 2014/12/06. doi: 10.1074/jbc.R114.573675. PubMed  
913 PMID: 25477522; PubMed Central PMCID: PMCPMC4326811.
- 914 45. Rebeil R, Sun Y, Kinsland C, Chooback L, Pedraza-Reyes M, Begley TP, et al. Spore  
915 photoproduct lyase from *Bacillus subtilis* spores is a novel iron-sulfur DNA repair enzyme which  
916 shares features with proteins such as class III anaerobic ribonucleotide reductases and  
917 pyruvate-formate lyases. J Bacteriol. 1998;180(18):4879-85.
- 918 46. Yang L, Li L. The enzyme-mediated direct reversal of a dithymine photoproduct in  
919 germinating endospores. Int J Mol Sci. 2013;14(7):13137-53. Epub 2013/06/27. doi:  
920 10.3390/ijms140713137. PubMed PMID: 23799365; PubMed Central PMCID:  
921 PMCPMC3742179.
- 922 47. Munakata N, Ruper CS. Genetically controlled removal of "spore photoproduct" from  
923 deoxyribonucleic acid of ultraviolet-irradiated *Bacillus subtilis* spores. J Bacteriol.  
924 1972;111(1):192-8.
- 925 48. Setlow B, Setlow P. Thymine-containing dimers as well as spore photoproducts are  
926 found in ultraviolet-irradiated *Bacillus subtilis* spores that lack small acid-soluble proteins. Proc  
927 Natl Acad Sci. 1987;84:421-3.
- 928 49. Sanchez-Salas J-L, Santiago-Lara ML, Sussman MD, Setlow P. Properties of *Bacillus*  
929 *megaterium* and *Bacillus subtilis* mutants which lack the protease that degrades small, acid-  
930 soluble proteins during spore germination. J Bacteriol. 1992;174(3):804-14.
- 931 50. Carrillo-Martinez Y, Setlow P. Properties of *Bacillus subtilis* Small, acid-soluble spore  
932 proteins with changes in the sequence recognized by their specific protease J Bacteriol.  
933 1994;176(17):5357-63.
- 934 51. Illades-Aguilar E, Setlow P. Studies of the processing of the protease which initiates  
935 degradation of small, acid-soluble proteins during germination of spores of *Bacillus* species. J  
936 Bacteriol. 1994;176(10):2788-95.
- 937 52. McAllister KN, Bouillaut L, Kahn JN, Self WT, Sorg JA. Using CRISPR-Cas9-mediated  
938 genome editing to generate *C. difficile* mutants defective in selenoproteins synthesis. Sci Rep.

- 939 2017;7(1):14672. Epub 2017/11/09. doi: 10.1038/s41598-017-15236-5. PubMed PMID:  
940 29116155; PubMed Central PMCID: PMCPMC5677094.
- 941 53. Sorg JA, Sonenshein AL. Bile salts and glycine as cogermnants for *Clostridium difficile*  
942 spores. J Bacteriol. 2008;190(7):2505-12. Epub 2008/02/05. doi: 10.1128/JB.01765-07.  
943 PubMed PMID: 18245298; PubMed Central PMCID: PMCPMC2293200.
- 944 54. Moeller R, Setlow P, Horneck G, Berger T, Reitz G, Rettberg P, et al. Roles of the major,  
945 small, acid-soluble spore proteins and spore-specific and universal DNA repair mechanisms in  
946 resistance of *Bacillus subtilis* spores to ionizing radiation from X rays and high-energy charged-  
947 particle bombardment. J Bacteriol. 2008;190(3):1134-40. Epub 2007/12/07. doi:  
948 10.1128/JB.01644-07. PubMed PMID: 18055591; PubMed Central PMCID: PMCPMC2223577.
- 949 55. Van Wang TC, Ruper CS. Evidence for the monomerization of spore photoproduct to  
950 two thymines by the light-independent "spore repair" process in *Bacillus subtilis*. Photochemistry  
951 and Photobiology 1977;25:123-7.
- 952 56. Shrestha R, Sorg JA. Hierarchical recognition of amino acid co-germinants during  
953 *Clostridioides difficile* spore germination. Anaerobe. 2018;49:41-7. Epub 2017/12/10. doi:  
954 10.1016/j.anaerobe.2017.12.001. PubMed PMID: 29221987; PubMed Central PMCID:  
955 PMCPMC5844826.
- 956 57. Francis MB, Allen CA, Sorg JA. Spore cortex hydrolysis precedes dipicolinic acid release  
957 during *Clostridium difficile* spore germination. J Bacteriol. 2015;197(14):2276-83. Epub  
958 2015/04/29. doi: 10.1128/JB.02575-14. PubMed PMID: 25917906; PubMed Central PMCID:  
959 PMCPMC4524186.
- 960 58. Francis MB, Sorg JA. Dipicolinic acid release by germinating *Clostridium difficile* spores  
961 occurs through a mechanosensing mechanism. mSphere. 2016;1(6). Epub 2016/12/17. doi:  
962 10.1128/mSphere.00306-16. PubMed PMID: 27981237; PubMed Central PMCID:  
963 PMCPMC5156672.
- 964 59. Burns DA, Heap JT, Minton NP. SleC is essential for germination of *Clostridium difficile*  
965 spores in nutrient-rich medium supplemented with the bile salt taurocholate. J Bacteriol.  
966 2010;192(3):657-64. Epub 2009/11/26. doi: 10.1128/JB.01209-09. PubMed PMID: 19933358;  
967 PubMed Central PMCID: PMCPMC2812441.
- 968 60. Gutelius D, Hokeness K, Logan SM, Reid CW. Functional analysis of SleC from  
969 *Clostridium difficile*: an essential lytic transglycosylase involved in spore germination.  
970 Microbiology. 2014;160(Pt 1):209-16. Epub 2013/10/22. doi: 10.1099/mic.0.072454-0. PubMed  
971 PMID: 24140647; PubMed Central PMCID: PMCPMC3917228.
- 972 61. Shrestha R, Cochran AM, Sorg JA. The requirement for co-germinants during  
973 *Clostridium difficile* spore germination is influenced by mutations in *yabG* and *cspA*. PLoS  
974 Pathog. 2019;15(4):e1007681. Epub 2019/04/04. doi: 10.1371/journal.ppat.1007681. PubMed  
975 PMID: 30943268.
- 976 62. Rastogi RP, Richa, Kumar A, Tyagi MB, Sinha RP. Molecular mechanisms of ultraviolet  
977 radiation-induced DNA damage and repair. J Nucleic Acids. 2010;2010:592980. Epub  
978 2011/01/07. doi: 10.4061/2010/592980. PubMed PMID: 21209706; PubMed Central PMCID:  
979 PMCPMC3010660.
- 980 63. Nerandzic MM, Cadnum JL, Pultz MJ, Donskey CJ. Evaluation of an automated  
981 ultraviolet radiation device for decontamination of *Clostridium difficile* and other healthcare-  
982 associated pathogens in hospital rooms. BMC Infect Dis. 2010;10:197. Epub 2010/07/10. doi:  
983 10.1186/1471-2334-10-197. PubMed PMID: 20615229; PubMed Central PMCID:  
984 PMCPMC2910020.
- 985 64. Liscynesky C, Hines LP, Smyer J, Hanrahan M, Orellana RC, Mangino JE. The effect of  
986 ultraviolet light on *Clostridium difficile* spore recovery versus bleach alone. Infect Control Hosp  
987 Epidemiol. 2017;38(9):1116-7. Epub 2017/07/04. doi: 10.1017/ice.2017.126. PubMed PMID:  
988 28669367.

- 989 65. Joshi LT, Welsch A, Hawkins J, Baillie L. The effect of hospital biocide sodium  
990 dichloroisocyanurate on the viability and properties of *Clostridium difficile* spores. Lett Appl  
991 Microbiol. 2017;65(3):199-205. Epub 2017/06/24. doi: 10.1111/lam.12768. PubMed PMID:  
992 28639362.
- 993 66. Dahl JL, Fordice D. Small acid-soluble proteins with intrinsic disorder are required for UV  
994 resistance in *Myxococcus xanthus* spores. J Bacteriol. 2011;193(12):3042-8. Epub 2011/04/26.  
995 doi: 10.1128/JB.00293-11. PubMed PMID: 21515768; PubMed Central PMCID:  
996 PMCPMC3133216.
- 997 67. Fairhead H, Setlow B, Setlow P. Prevention of DNA damage in spores and in vitro by  
998 small, acid-soluble proteins from *Bacillus* species. J Bacteriol. 1993;175(5):1367-74.
- 999 68. Setlow P. Resistance of spores of *Bacillus* species to ultraviolet light. Environmental and  
1000 Molecular Mutagenesis 2001;38:97-104.
- 1001 69. Permpoonpattana P, Tolls EH, Nadem R, Tan S, Brisson A, Cutting SM. Surface layers  
1002 of *Clostridium difficile* endospores. J Bacteriol. 2011;193(23):6461-70. Epub 2011/09/29. doi:  
1003 10.1128/JB.05182-11. PubMed PMID: 21949071; PubMed Central PMCID: PMCPMC3232898.
- 1004 70. Permpoonpattana P, Phetcharaburanin J, Mikelsone A, Dembek M, Tan S, Brisson MC,  
1005 et al. Functional characterization of *Clostridium difficile* spore coat proteins. J Bacteriol.  
1006 2013;195(7):1492-503. Epub 2013/01/22. doi: 10.1128/JB.02104-12. PubMed PMID: 23335421;  
1007 PubMed Central PMCID: PMCPMC3624542.
- 1008 71. Setlow B, Atluri S, Kitchel R, Koziol-Dube K, Setlow P. Role of dipicolinic acid in  
1009 resistance and stability of spores of *Bacillus subtilis* with or without DNA-protective alpha/beta-  
1010 type small acid-soluble proteins. J Bacteriol. 2006;188(11):3740-7. Epub 2006/05/19. doi:  
1011 10.1128/JB.00212-06. PubMed PMID: 16707666; PubMed Central PMCID: PMCPMC1482921.
- 1012 72. Hindle AA, Hall EAH. Dipicolinic acid (DPA) assay revisited and appraised for spore  
1013 detection Analyst. 1999;124:1599-604.
- 1014 73. Shen A, Fimlaid KA, Pishdadian K. Inducing and quantifying *Clostridium difficile* spore  
1015 formation. In: Roberts AP, Mullany P, editors. *Clostridium difficile: Methods and Protocols*. New  
1016 York, NY: Springer New York; 2016. p. 129-42.
- 1017 74. Saujet L, Pereira FC, Henriques AO, Martin-Verstraete I. The regulatory network  
1018 controlling spore formation in *Clostridium difficile*. FEMS Microbiol Lett. 2014;358(1):1-10. Epub  
1019 2014/07/23. doi: 10.1111/1574-6968.12540. PubMed PMID: 25048412.
- 1020 75. Ramirez-Peralta A, Stewart KA, Thomas SK, Setlow B, Chen Z, Li YQ, et al. Effects of  
1021 the SpoVT regulatory protein on the germination and germination protein levels of spores of  
1022 *Bacillus subtilis*. J Bacteriol. 2012;194(13):3417-25. Epub 2012/04/24. doi: 10.1128/JB.00504-  
1023 12. PubMed PMID: 22522895; PubMed Central PMCID: PMCPMC3434735.
- 1024 76. Setlow B, McGinnis KA, Ragkousi K, Setlow P. Effects of major spore-specific DNA  
1025 binding proteins on *Bacillus subtilis* sporulation and spore properties J Bacteriol.  
1026 2000;182(24):6906-12.
- 1027 77. Sorg JA, Dineen SS. Laboratory maintenance of *Clostridium difficile*. Curr Protoc  
1028 Microbiol. 2009;Chapter 9:Unit9A 1. Epub 2009/02/24. doi:  
1029 10.1002/9780471729259.mc09a01s12. PubMed PMID: 19235151.
- 1030 78. Gibson DG, Young L, Chuang RY, Venter JC, Hutchison CA, 3rd, Smith HO. Enzymatic  
1031 assembly of DNA molecules up to several hundred kilobases. Nat Methods. 2009;6(5):343-5.  
1032 Epub 2009/04/14. doi: 10.1038/nmeth.1318. PubMed PMID: 19363495.
- 1033 79. Müh U, Pannullo AG, Weiss DS, Ellermeier CD. A xylose-inducible expression system  
1034 and a CRISPR interference plasmid for targeted knockdown of gene expression in  
1035 *Clostridioides difficile*. J Bacteriol. 2019;201(14). Epub 2019/02/13. doi: 10.1128/jb.00711-18.  
1036 PubMed PMID: 30745377; PubMed Central PMCID: PMCPMC6597395.
- 1037 80. Ransom EM, Ellermeier CD, Weiss DS. Use of mCherry Red fluorescent protein for  
1038 studies of protein localization and gene expression in *Clostridium difficile*. Appl Environ

- 1039 Microbiol. 2015;81(5):1652-60. Epub 2014/12/21. doi: 10.1128/AEM.03446-14. PubMed PMID:  
1040 25527559; PubMed Central PMCID: PMC4325159.
- 1041 81. Francis MB, Allen CA, Sorg JA. Muricholic acids inhibit *Clostridium difficile* spore  
1042 germination and growth. PLoS One. 2013;8(9):e73653. Epub 2013/09/17. doi:  
1043 10.1371/journal.pone.0073653. PubMed PMID: 24040011; PubMed Central PMCID:  
1044 PMCPMC3767737.
- 1045 82. Shrestha R, Sorg JA. Terbium chloride influences *Clostridium difficile* spore germination.  
1046 Anaerobe. 2019;58:80-8. Epub 2019/03/31. doi: 10.1016/j.anaerobe.2019.03.016. PubMed  
1047 PMID: 30926439; PubMed Central PMCID: PMC6697597.
- 1048

|         |    |                                                               |
|---------|----|---------------------------------------------------------------|
| Bs_SspA | 1  | MAN---N-----NSGNSNNLLVPGAAQAIDQMKLEIASSEFGVN-LG-----ADTTSRANG |
| Cd_SspA | 1  | MAS-----NNNNNRVVPGAKEALNQMKLEIANELGMSNYQ-QVDKGNLTARENG        |
| Cd_SspB | 1  | LRR---K----FTMSNSNRTVVPPEAKAALNQMKLEIANEIGLSNYE-NIDKGNLTARENG |
| Cd_1130 | 1  | MDD-----VS-----RQNAIKALKQTKMEIAGEYGMN-YE-DAFEIENASNKG         |
| Cd_3080 | 1  | VIFLKEKVQREKKITNGKNTKIL---TNDDIMKYEIASSELGLMDKVGERGWAGLTAKEAG |
|         |    |                                                               |
| Bs_SspA | 47 | SVGGEITKR---LVSFAQQ-NM-GGGQ----F                              |
| Cd_SspA | 50 | YVGGYMTKK---LVEMAEQ-QM-AGKSN---R                              |
| Cd_SspB | 53 | YVGGYMTKK---LVEMAER-QM-AG-----K                               |
| Cd_1130 | 43 | VLEGYFKK-----LEKKKNL-GQGISRHLE                                |
| Cd_3080 | 58 | RIGGMLTSRKKRLKKIVEE-QNKKDES----I                              |

↑ GPR cleavage site in *B. subtilis* SspA      ↑ Some Clostridial Ssp proteins have a 5 amino acid insertion in this region



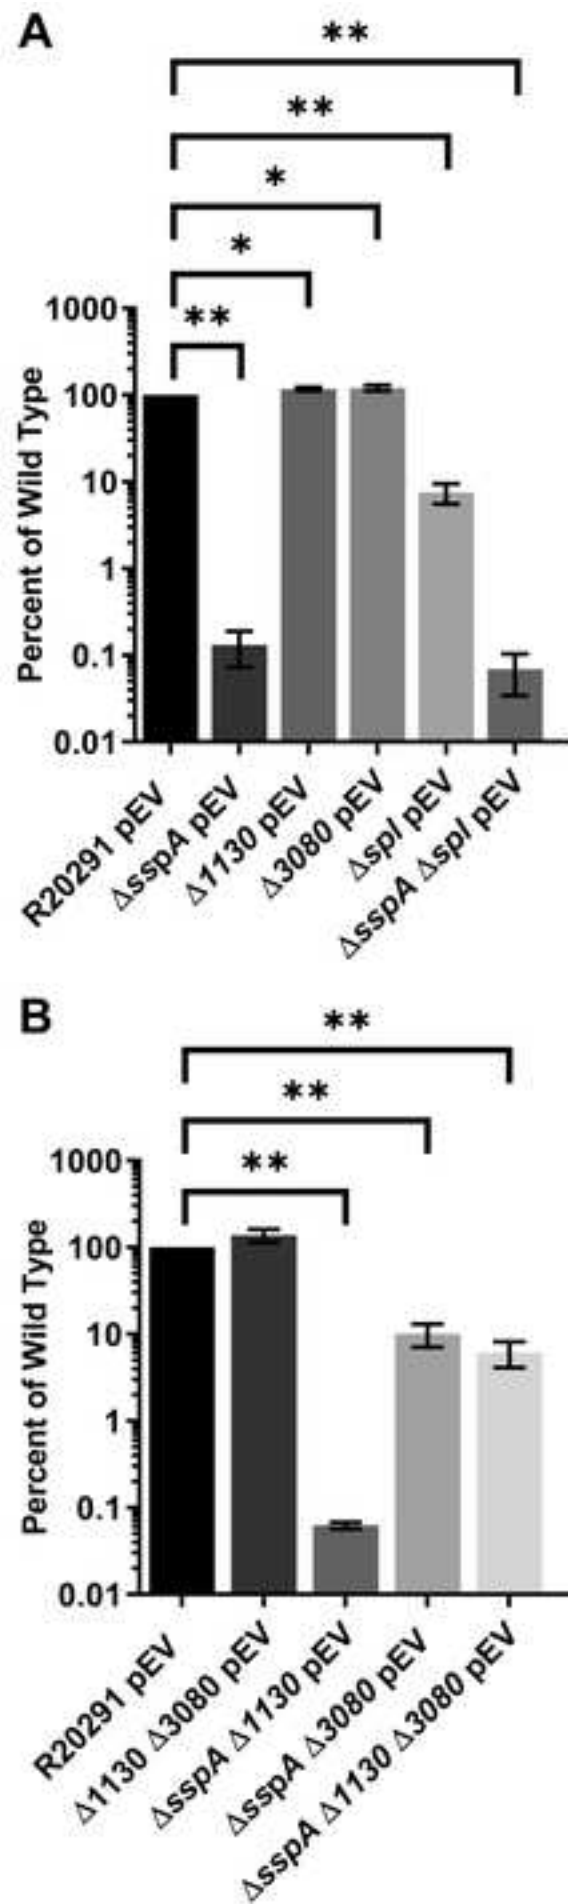

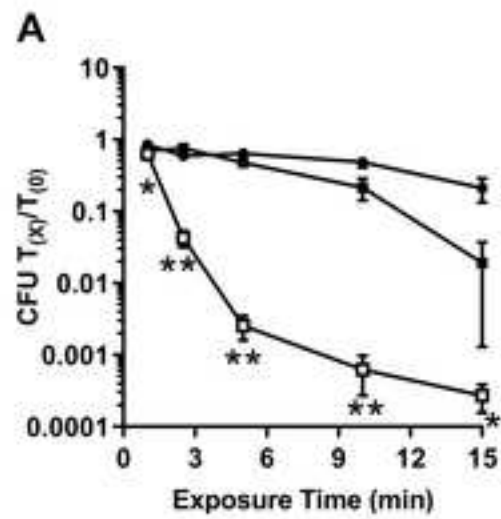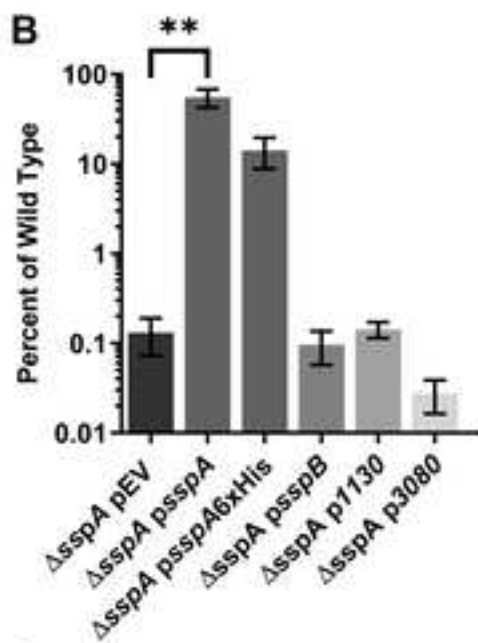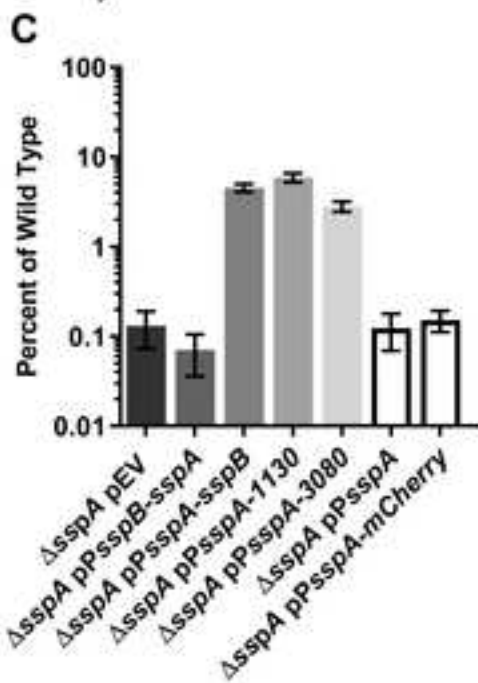

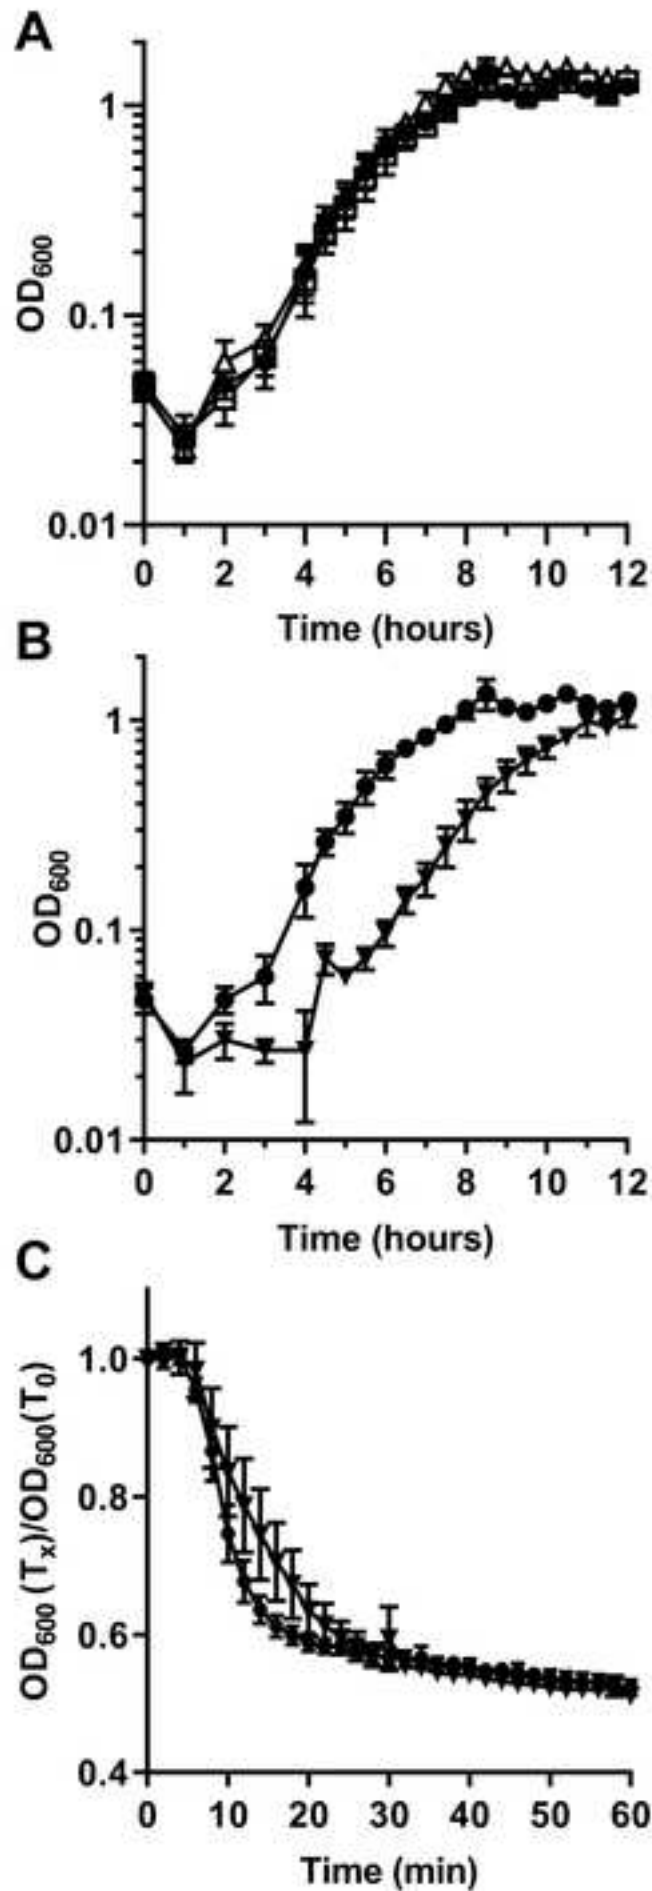

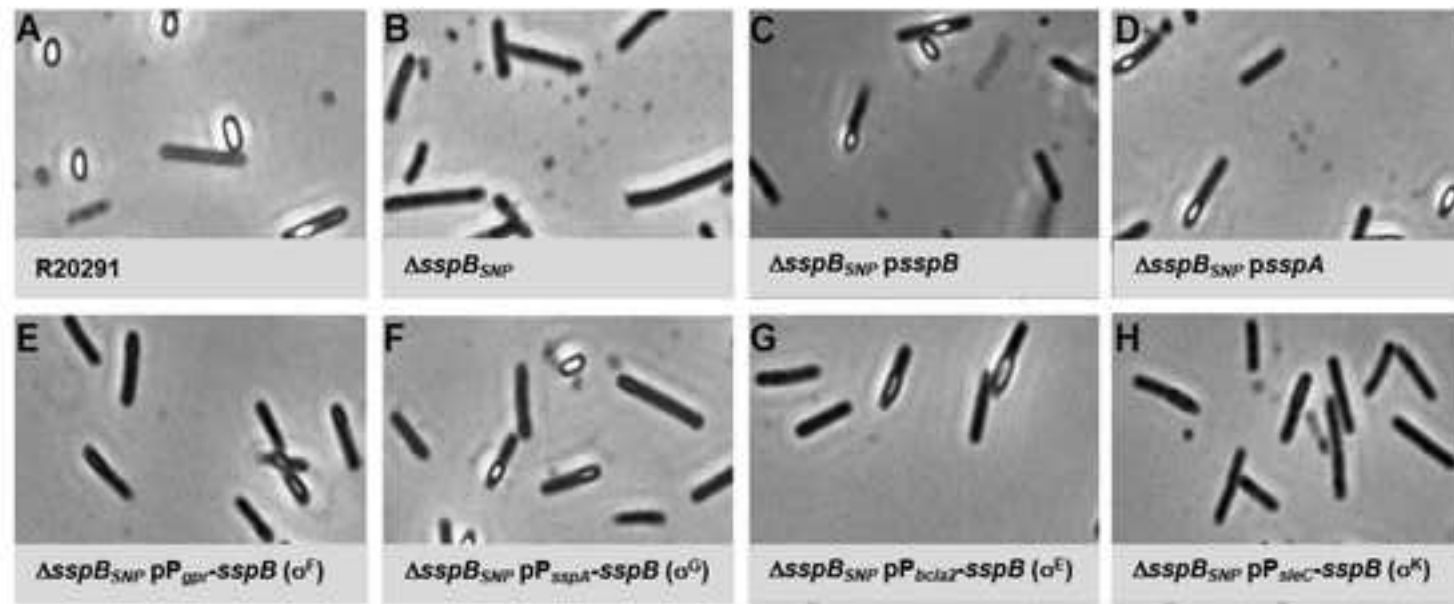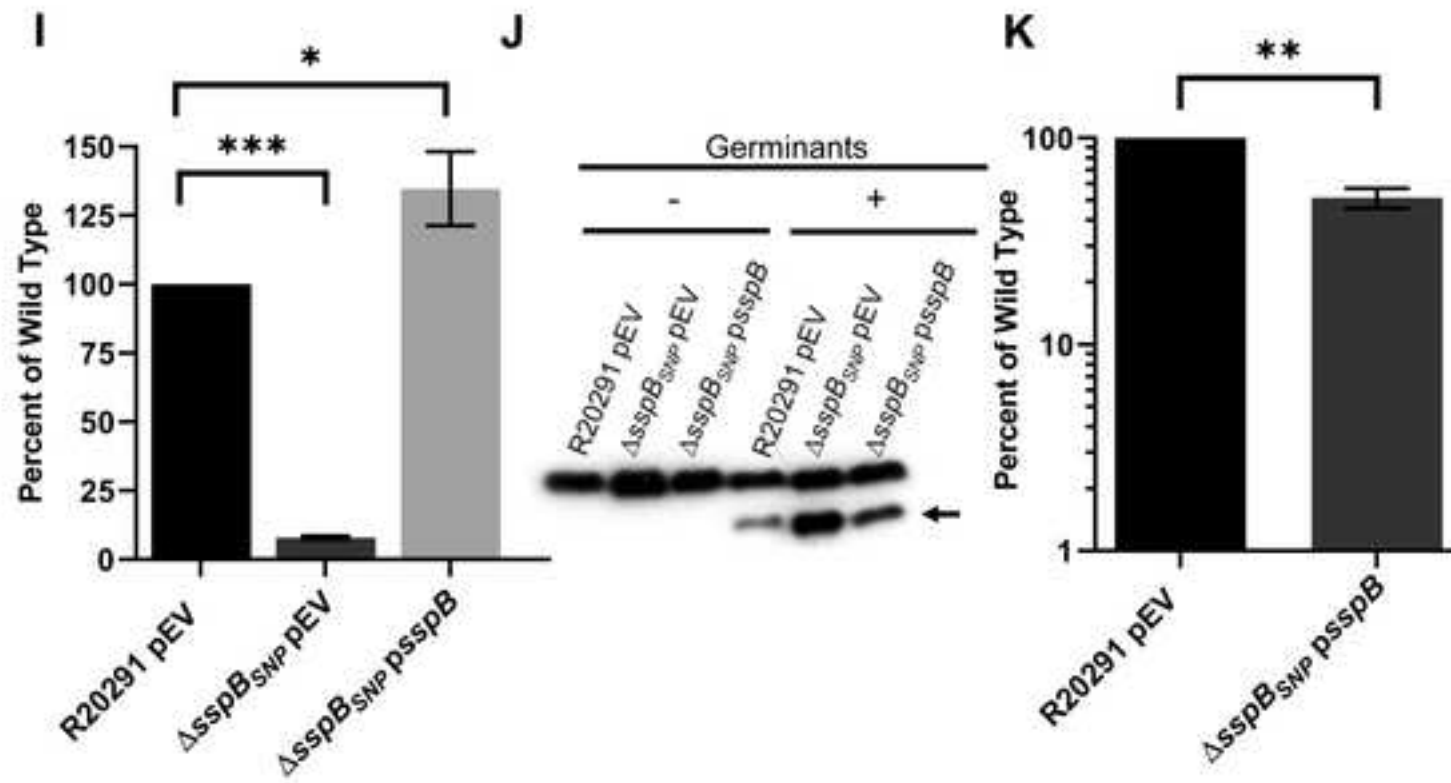

**A**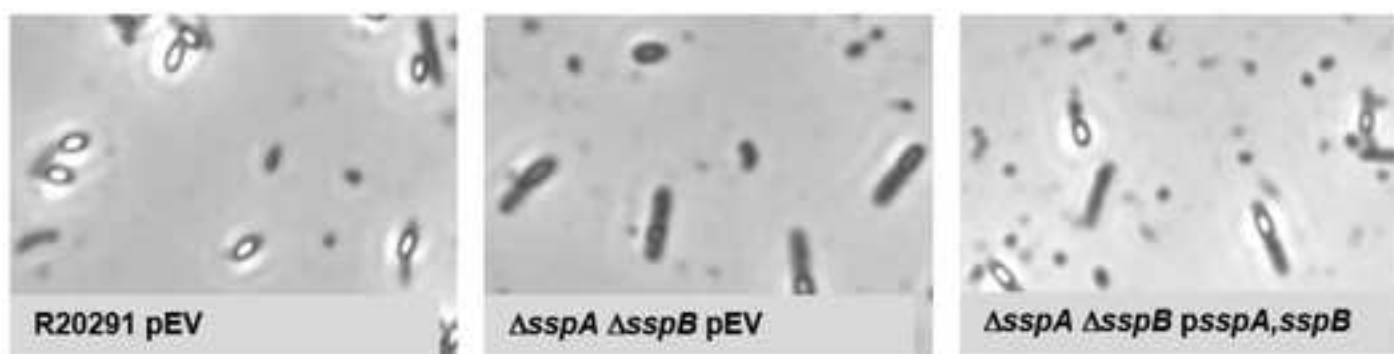**B**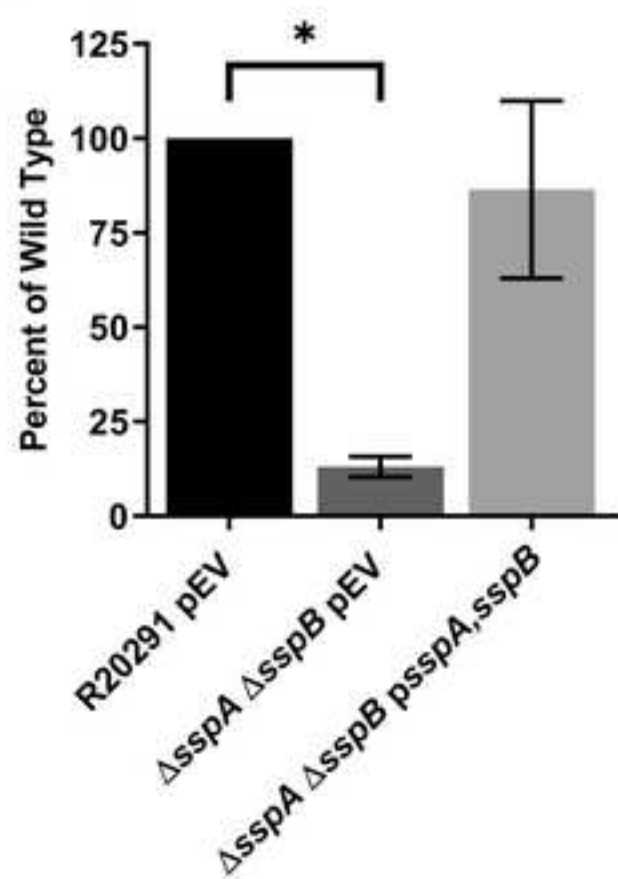**C**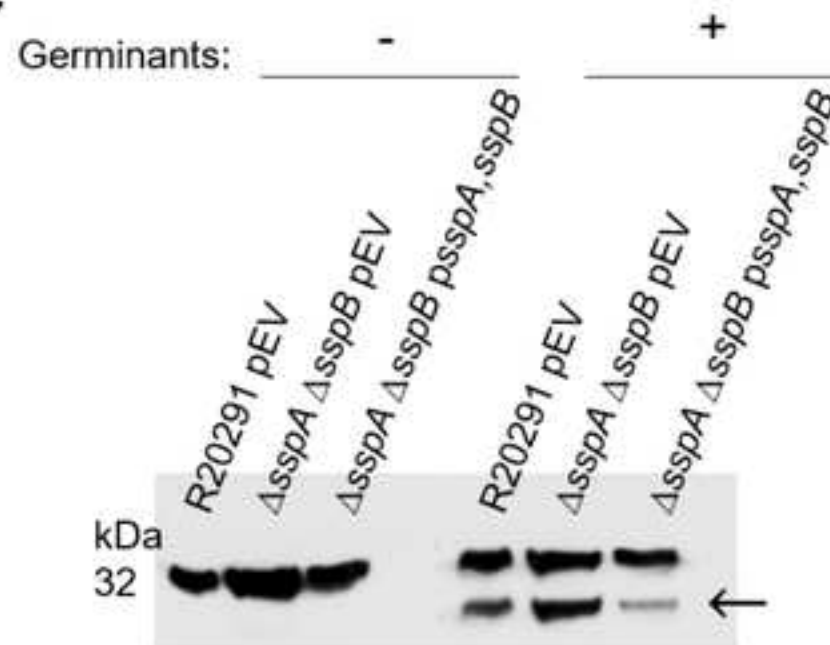

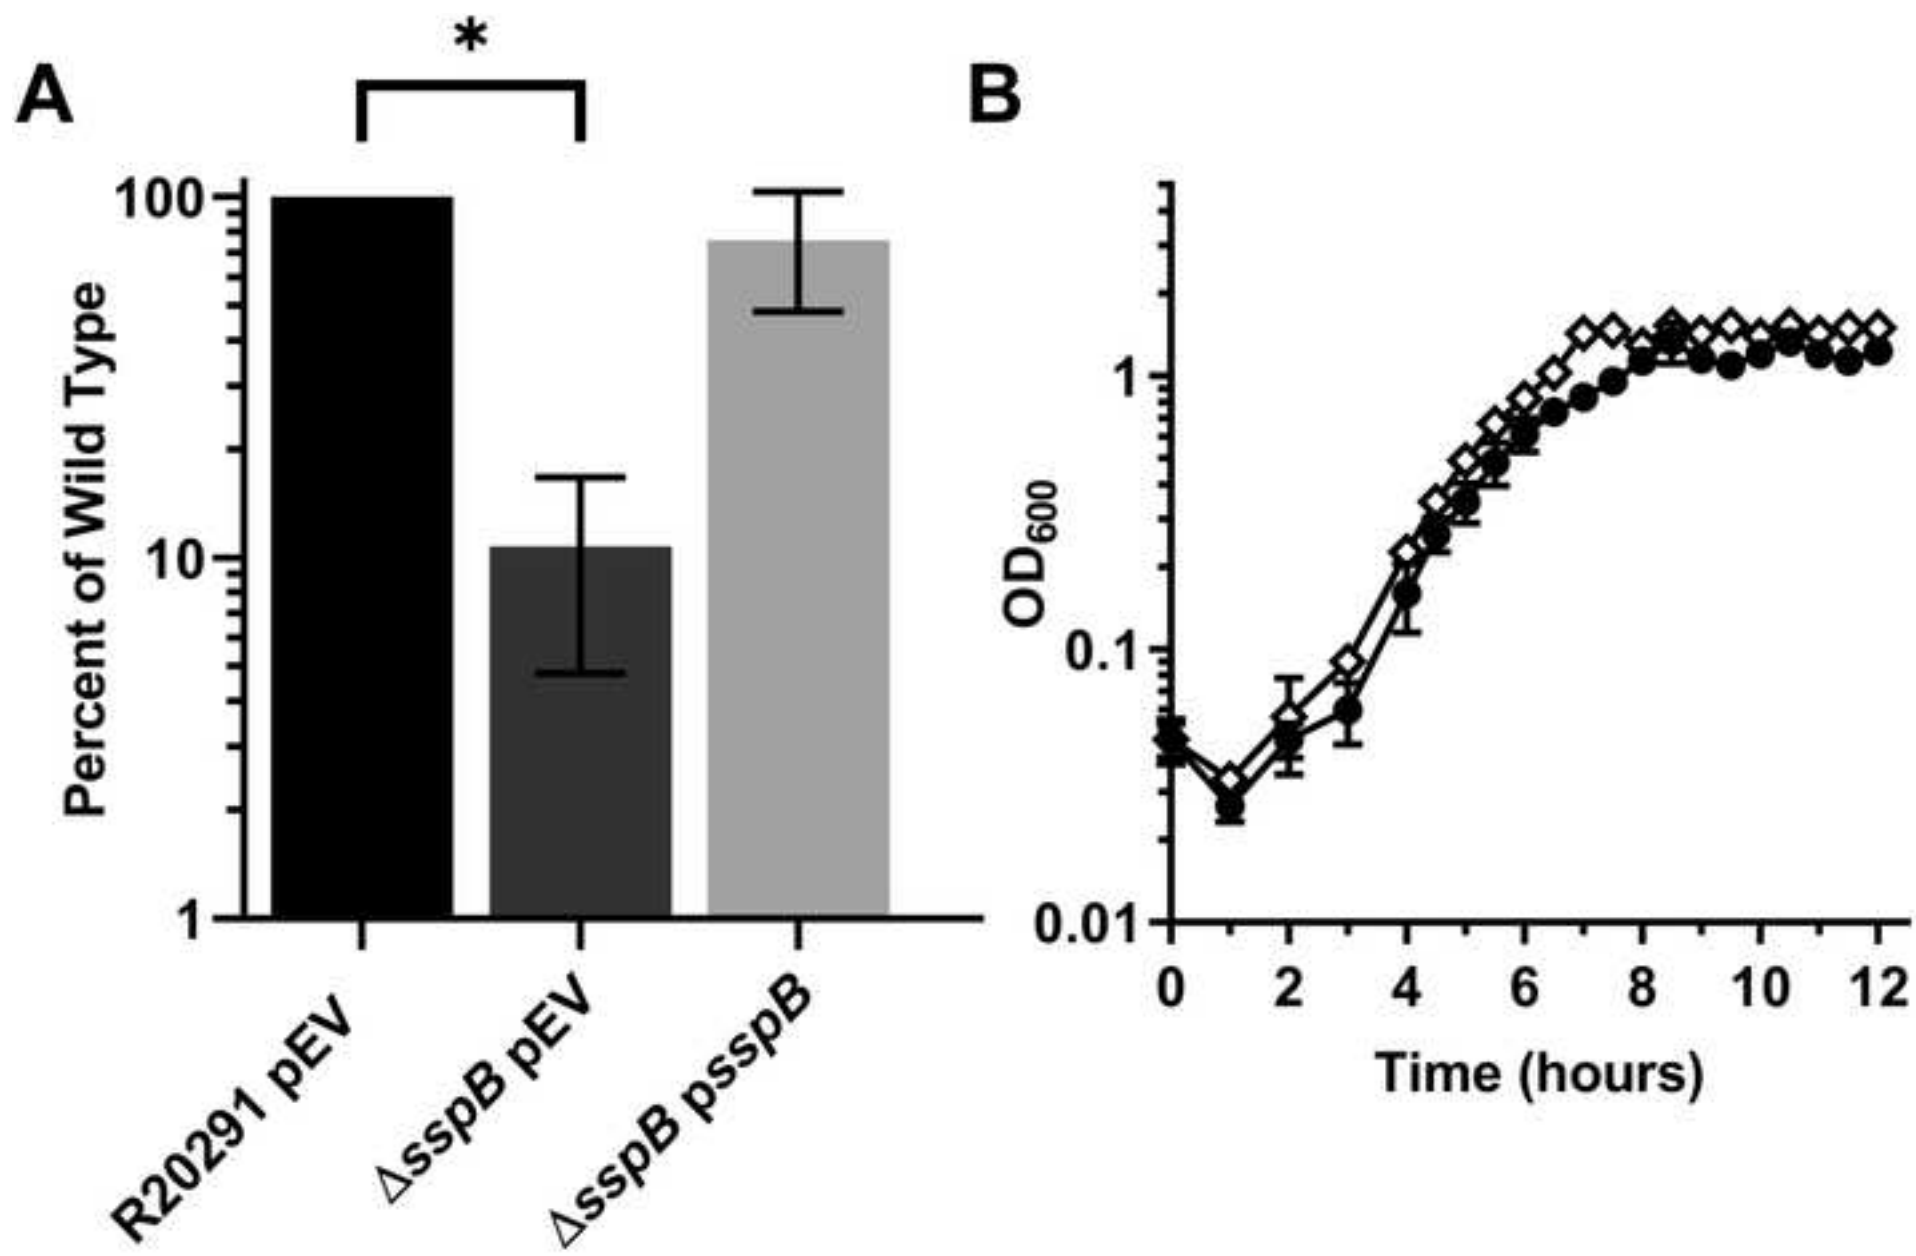

**Supplement Figure 1. Sporulation efficiency is not affected by deletion of *sspA*,**

***CDR20291\_1130* or *CDR20291\_3080* alone.** Strains were grown on sporulation medium for two days. Sporulating cultures were heat treated at 65 °C. Sporulation rate was determined by comparison of the CFU of heat treated culture to CFU of untreated culture and then the ratios were compared to wildtype. pEV indicates an empty vector.

All data represents the average of three independent experiments. Statistical analysis by one way ANOVA with Dunnett's multiple comparison test.

**Supplement Figure 2. Chemical resistance is not impacted by loss of individual SASPs. 1**

$\times 10^7$  spores were exposed to chemicals for 1, 5, 10, or 30 minutes. After exposure, solutions were serially diluted and plated onto rich medium with germinants. The CFUs were enumerated and compared to unexposed samples and then this ratio was compared with that of the wildtype spores. A) 3% H<sub>2</sub>O<sub>2</sub> B) 75% EtOH C) 0.25% Glutaraldehyde D) 1 M HCL E) 0.05% hypochlorite F) 2.5% Formaldehyde G) 250 mM Nitrous Acid. pEV indicates an empty vector.

All data represents the average of three independent experiments. Statistical analysis by two way ANOVA with Dunnett's multiple comparison. A) *C. difficile*  $\Delta$ *sspA* pEV and *C. difficile*  $\Delta$ *sspA* p*sspA* P<0.0001 at 30 minutes. C) P<0.001 for *C. difficile*  $\Delta$ *sspB* p*sspB* 5 minutes and *C. difficile*  $\Delta$ *sspA* p*sspA* at 10 minutes. P<0.05 for *C. difficile*  $\Delta$ *CDR20291\_3080* pEV at 10 minutes. D) P<0.05 for *C. difficile*  $\Delta$ *sspA* p*sspA* at 5 minutes and *C. difficile*  $\Delta$ *sspB* p*sspB* at 30 minutes. P<0.01 for *C. difficile*  $\Delta$ *sspA* p*sspA* at 10 minutes. P<0.001 for *C. difficile*  $\Delta$ *sspA* pEV and *C. difficile*  $\Delta$ *sspA* p*sspA* at 30 minutes. E) P<0.01 for *C. difficile*  $\Delta$ *sspB* p*sspB* at 1 minute. F) P<0.05 for *C. difficile*  $\Delta$ *CDR20291\_3080* at 10 minutes. G) P<0.05 for *C. difficile*  $\Delta$ *CDR20291\_1130* at 5 minutes, *C. difficile*  $\Delta$ *sspA* pEV and *C. difficile*  $\Delta$ *CDR20291\_1130* pEV

at 10 minutes.  $P < 0.01$  for *C. difficile*  $\Delta CDR20291\_3080$  at 5 minutes.  $P < 0.001$  for *C. difficile*  $\Delta sspA$  pEV at 5 minutes.

**Supplement Figure 3. Sporulation efficiency of mutant strains.** Strains were grown on sporulation medium for two days. Sporulating cultures were heat treated at 65 °C. Sporulation rate was determined by taking the ratio of the CFU of heat treated culture to CFU of untreated culture and then the ratios were compared to wildtype. pEV indicates an empty vector.

All data represents the average of three independent experiments. Statistical analysis by one way ANOVA with Dunnett's multiple comparison test.

**Supplement Figure 4. Coomassie-stained gel of  $\Delta sspA$   $\Delta sspB$  samples.** The same sample volumes used for the  $\Delta sspA$   $\Delta sspB$  SleC cleavage assay were separated by a 15% SDS PAGE and stained with Coomassie. pEV indicates an empty vector.

**Supplement Table 1. Primers used in this study.**

| Primer Name | Sequence                                             |
|-------------|------------------------------------------------------|
| 5'sspA_MTL  | ttatcaggaaacagctatgaccgcgccgcttagatgaggaaaaactggataa |



|                    |                                                                                                                                                                                                                        |
|--------------------|------------------------------------------------------------------------------------------------------------------------------------------------------------------------------------------------------------------------|
|                    |                                                                                                                                                                                                                        |
| 3'sspA_up          | ttattataactatctgtgcttttccaggtgattacctcctctgttta                                                                                                                                                                        |
| 5'sspA_down        | aataaattaacagaaggaaggtaatcaacctggaaaaagcaacagatagt                                                                                                                                                                     |
| 3'sspA_downMTL     | ctgcgatcgcgcatgtctgcaggcctcgagctattgaacttggaatgagag                                                                                                                                                                    |
| CRISPR_sspA_165    | gtgtgctataaataaactgtaaaacgcgtGACTAAAAATTAGTTGAAAGTTTT<br>AGAGCTAGAAATAGCAAGTTAAAATAAGGCTAGTCCGTTATCA<br>ACTTGAAAAAGTGGCACCGAGTCGGTGCTTTTTTTCTATGGAG<br>AAATCTAGATCAGCATGATGTCTGACTAGACGCGTaaagctctgcaac<br>tatttttagat |
| 5' spl_UP          | ttatcaggaaacagctatgaccgcgccgctattatagaaagttcatggg                                                                                                                                                                      |
| 3' spl_UP          | atatagcaaatctttaggttaagatttgcatttattccacttacttaa                                                                                                                                                                       |
| 5' spl_DN          | taaaactttaagtagaggtgaaataaatggcaaatcttacctaaagatt                                                                                                                                                                      |
| 3' spl_DN          | caggctcttattttatgctagctcgaggatttgctctatattttctg                                                                                                                                                                        |
| CRISPR_spl_647     | gtgtgctataaataaactgtaaaacgcgtgtcagctgtaaaacttgctaGTTTTAGAGCT<br>AGAAATAGCAAGTTAAAATAAGGCTAGTCCGTTATCAACTTGAA<br>AAAGTGGCACCGAGTCGGTGCTTTTTTTCTATGGAGAAATCTA<br>GATCAGCATGATGTCTGACTAGACGCGTaaagctctgcaactatttttagat    |
| 5' sspB UP         | atTTTTatcaggaaacagctatgaccgcgccgcttttaaatatcatccatattat                                                                                                                                                                |
| 3' sspB UP         | tgtaaaatftactattttttccagccacctcaataaattagtttatgatg                                                                                                                                                                     |
| 5' sspB DN         | tgtagacatcataaactaattatttgaggtggctggaaaataaatagta                                                                                                                                                                      |
| 3' sspB DN         | tctgcatcgcgcatgtctgcaggcctcgagatactgtctatttttcagtaaca                                                                                                                                                                  |
| CRISPR_sspB_144    | aattaaactgtaaaggtaccagagaaaatggatatgttgGTTTTAGAGCTAGAA<br>ATAGCAAGTTAAAATAAGGCTAGTCCGTTATCAACTTGAAAAAG<br>TGGCACCGAGTCGGTGCTTTTTTTCTATGGAGAAATCTAGATC<br>AGCATGATGTCTGACTAGACGCGTaaagctctgcaacta                       |
| 5' sspB.xylR       | gtgttactgaaaaaatagacaagtatctcgagctagcataaaaaataagaagcct                                                                                                                                                                |
| 5'CDR20291_1130_UP | atTTTTatcaggaaacagctatgaccgcgccgcttattatcagaagatggt                                                                                                                                                                    |
| 3'CDR20291_1130_UP | tttctcacatttaacttttttattccataagaatcctcctatcagtaaaatttat                                                                                                                                                                |
| 5'CDR20291_1130_DN | tactgataggaggattcttatggaataaaaaaagttaaatgtgagaaaaataag                                                                                                                                                                 |
| 3'CDR20291_1130_DN | tctgcatcgcgcatgtctgcaggcctcgagatcaacaaatccttcaaca                                                                                                                                                                      |

|                          |                                                                                                                                                                                                                        |
|--------------------------|------------------------------------------------------------------------------------------------------------------------------------------------------------------------------------------------------------------------|
| CRISPR_CDR20291_1130_114 | gtgtgctataaattaaactgtaaaacgcggttctaataaagggtgttttagaGTTTTAGAGCT<br>AGAAATAGCAAGTTAAAATAAGGCTAGTCCGTTATCAACTTGAA<br>AAAGTGGCACCGAGTCGGTGCTTTTTTCTATGGAGAAATCTA<br>GATCAGCATGATGTCTGACTAGACGCGTaagctctgcaactatttttagat   |
| 5'CDR20291_3080_UP       | atTTTTtaccaggaaacagctatgaccgcgccgcatttggccacatatagctatat                                                                                                                                                               |
| 3'CDR20291_3080_UP       | ttaattgacaaaaatacaaaataagaagggggtgattttgcggtttgtatatg                                                                                                                                                                  |
| 5'CDR20291_3080_DN       | cataagtcatcatatacaaaacgcaaaatcacccttcttattgtattttgtc                                                                                                                                                                   |
| 3'CDR20291_3080_DN       | tctgcatcgcatgtctgcaggcctcgagcagaagtgtatgagaaaatgaag                                                                                                                                                                    |
| CRISPR_CDR20291_3080_184 | gtgtgctataaattaaactgtaaaacgcggtTGCTTACATCACGCAAAAAGGTTT<br>TAGAGCTAGAAATAGCAAGTTAAAATAAGGCTAGTCCGTTATCA<br>ACTTGAAAAGTGGCACCGAGTCGGTGCTTTTTTCTATGGAG<br>AAATCTAGATCAGCATGATGTCTGACTAGACGCGTaagctctgcaac<br>tatttttagat |
| 3'cas9_Pxyl2             | taatcctatactatatttttatccatttaattaaactctcctttaccctcct                                                                                                                                                                   |
| 5'CD1130_HR_xyIR         | agctggaagtgtgaaggattgtgatctcgagctagcataaaaaataagaagcct                                                                                                                                                                 |
| 5'CD3080_HR_xyIR         | ctctaagcttattttctatacacttctgctcgagctagcataaaaaataagaagcct                                                                                                                                                              |
| 3' sspA.pJS116           | tgccaagcttgcattgtctgcaggcctcgagctatctgttctttccag                                                                                                                                                                       |
| 3' sspB.pJS116           | cagtccaagcttgcattgtctgcaggcctcgagttatttccagccattgtc                                                                                                                                                                    |
| 3' PsspB_ sspA           | gttctgtgtgtattgttacttgccatataattagttatgatgtcta                                                                                                                                                                         |
| 5' PsspB_ sspA           | agtgtttagacatcataaactaattatattggcaagtaacaataacaac                                                                                                                                                                      |
| 3' sspB_ sspA            | ttgaattgacatagtaaatttctcctcaagttgattaccttctctg                                                                                                                                                                         |
| 5' sspB_ sspA            | ataaattaaacagaaggaaggtaatacaactgaggaggaaatttactatg                                                                                                                                                                     |
| 5' 1130comp              | ttatcaggaaacagctatgaccgcgccgcaaagcatttatcagaagatg                                                                                                                                                                      |
| 3' 1130comp              | gccaagcttgcattgtctgcaggcctcgagttattctaaatgcctagatatacc                                                                                                                                                                 |
| 5' 3080comp              | ttatcaggaaacagctatgaccgcgccgcccagaagtgtatgagaaaa                                                                                                                                                                       |
| 3' 3080comp              | caagcttgcattgtctgcaggcctcgagctatattgactcatccttttattc                                                                                                                                                                   |
| 3' sspA_CD1130           | tagcattttgtctgaaacatcatccatgttgattaccttctctgttta                                                                                                                                                                       |
| 5' CD1130_ sspA          | ataaattaaacagaaggaaggtaatacaatggatgatgtttcaagacaaaa                                                                                                                                                                    |
| 3' sspA_CD3080           | tttctcttgtacttttcttcaaaaaaatcacgttgattaccttctctgtt                                                                                                                                                                     |

|                      |                                                             |
|----------------------|-------------------------------------------------------------|
|                      |                                                             |
| 5' CD3080_sspA       | aataaattaacagaaggaaggtaatcaacgtgattttttgaaagaaaaagtac       |
| 3' PsspA.mCherry     | gccatattatcttctccttagataccatgttgattaccttccttctg             |
| 5' PsspA.mCherry     | taaattaacagaaggaaggtaatcaacatggtatctaaaggagaagaag           |
| 3' mCherry.PsspA     | gtgccaagcttgcattgtctgcaggcctcgagttaaaacttataggatccgg        |
| 3' PsspA.pJS116      | agtccaagcttgcattgtctgcaggcctcgaggttgattaccttcctc            |
| 5' sigE.bclA2_pJS116 | ttatcaggaacagctatgaccgcgccgcttagtgccagattattgtgg            |
| 3' sigE.bclA2_sspB   | ttgacatagtaaatttctcctcaaataattaatcctcctttttaag              |
| 5' sigE.bclA2_sspB   | ctctaactttaaaaaaggaggattaattatttgaggaggaaatttactatg         |
| 3' sspB_pJS116       | tgccaagcttgcattgtctgcaggcctcgagttatttccagccattgtc           |
| 5' pJS116_sigK       | tttatcaggaacagctatgaccgcgccgctcagagcttttacaccttct           |
| 3' sigK_sspB         | aatttgacatagtaaatttctcctcaacaaatcacctttctttaaatg            |
| 5' sigK_sspB         | ctaaattcattaaagaaaggggtgattgttgaggaggaaatttactatg           |
| 5' pJS116_sigF       | ttatcaggaacagctatgaccgcgccgcaagaaatgaagtgcgtaa              |
| 3' sigF_sspB         | atttgacatagtaaatttctcctcaaataaacctccagtataaattaaatg         |
| 5' sigF_sspB         | attagcatttaatttatactggagggttatttgaggaggaaatttactatg         |
| 5'sspApJS116         | cgaattcgagctcgttaccggggatcctctagattagatgaggaaaaactggataaaag |
| 3' sspAsspB          | ggaactgataataggatgatattttaaactatctgtgcttttccagccattg        |
| 5' sspAsspB          | caaatggctggaaaaagcaacagatagttttaaataatcatccatattat          |
| 3' sspA.His_pJS116   | tgaggcctcgagctagtggtggtggtggtgctgtgcttttccagc               |

**Supplement Table 2. Strains and plasmids used in this study.**

| Strain                     | Description                                                                                                                                                                     | Reference                     |
|----------------------------|---------------------------------------------------------------------------------------------------------------------------------------------------------------------------------|-------------------------------|
| <i>E. coli</i> DH5a        | F <sup>-</sup> endA1 glnV44 thi-1 recA1 relA1 gyrA96 deoR nupG $\square\square$ 80dlacZ $\Delta$ M15 $\Delta$ (lacZYA-argF)U169, hsdR17(r $\square$ m $\square$ +), $\square$ - | [83]                          |
| <i>E. coli</i> MB3436      | recA <sup>+</sup> <i>E. coli</i> strain                                                                                                                                         | Gift from Dr. Michael Benedik |
| <i>B. subtilis</i> BS49    | Tn916 donor strain, Tet <sup>R</sup>                                                                                                                                            | [84]                          |
| <i>C. difficile</i> R20291 | Wild type, ribotype 027                                                                                                                                                         | [85]                          |
| <i>C. difficile</i> KNM10  | spo0A CRISPR-cas9 mutant                                                                                                                                                        | [86]                          |
| <i>C. difficile</i> HNN03  | sspA CRISPR-cas9 mutant                                                                                                                                                         | This study                    |
| <i>C. difficile</i> HNN04  | sspB CRISPR-cas9 mutant with an sspA <sub>G52V</sub> allele                                                                                                                     | This study                    |
| <i>C. difficile</i> HNN05  | sspA and sspB CRISPR-cas9 double mutant                                                                                                                                         | This study                    |
| <i>C. difficile</i> HNN06  | CDR20291_1130 CRISPR-cas9 mutant                                                                                                                                                | This study                    |
| <i>C. difficile</i> HNN07  | CDR20291_3080 CRISPR-cas9 mutant                                                                                                                                                | This study                    |
| <i>C. difficile</i> HNN10  | spI CRISPR-cas9 mutant                                                                                                                                                          | This study                    |
| <i>C. difficile</i> HNN11  | sspA and spI CRISPR-cas9 double mutant                                                                                                                                          | This study                    |
| <i>C. difficile</i> HNN12  | CDR20291_1130 and CDR20291_3080 CRISPR-cas9 double mutant                                                                                                                       | This study                    |
| <i>C. difficile</i> HNN14  | sspA and CDR20291_3080 CRISPR-cas9 double mutant                                                                                                                                | This study                    |
| <i>C. difficile</i> HNN15  | sspA and CDR20291_1130 CRISPR-cas9 double mutant                                                                                                                                | This study                    |
| <i>C. difficile</i> HNN16  | sspA and CDR20291_1130 and CDR20291_3080 CRISPR-cas9 triple mutant                                                                                                              | This study                    |
| <i>C. difficile</i> HNN17  | sspB CRISPR-cas9 mutant                                                                                                                                                         | This study                    |
|                            |                                                                                                                                                                                 |                               |
| Plasmid                    | Description                                                                                                                                                                     | Reference                     |
| pJS116                     | <i>B. subtilis</i> – <i>C. difficile</i> shuttle vector pCD6 ColE1 Tn916 oriT Cm <sup>R</sup>                                                                                   | [53]                          |
| pKM126                     | CRISPR plasmid with tetR promoter driving cas9                                                                                                                                  | [52]                          |
| pKM197                     | CRISPR plasmid with xylR promoter driving cas9                                                                                                                                  | [87]                          |
| pIA33                      | xylR containing plasmid                                                                                                                                                         | [79]                          |
| pRAN473                    | mCherry containing plasmid                                                                                                                                                      | [80]                          |
| pGC05                      | sspB targeting CRISPR plasmid                                                                                                                                                   | This study                    |

|        |                                                                        |            |
|--------|------------------------------------------------------------------------|------------|
| pHN05  | <i>sspA</i> targeting CRISPR plasmid                                   | This study |
| pHN11  | <i>sspA</i> promoter region and gene                                   | This study |
| pHN14  | <i>sspB</i> promoter region and gene                                   | This study |
| pHN30  | <i>sspA</i> and <i>sspB</i> complement                                 | This study |
| pHN32  | 1130 targeting CRISPR plasmid                                          | This study |
| pHN34  | 3080 targeting CRISPR plasmid                                          | This study |
| pHN47  | <i>gpr</i> promoter region and <i>sspB</i> gene                        | This study |
| pHN49  | <i>sleC</i> promoter region and <i>sspB</i> gene                       | This study |
| pHN56  | 1130 promoter region and gene                                          | This study |
| pHN57  | 3080 promoter region and gene                                          | This study |
| pHN61  | <i>spI</i> targeting CRISPR plasmid                                    | This study |
| pHN80  | <i>bclA2</i> promoter region and <i>sspB</i> gene                      | This study |
| pHN83  | <i>sspA</i> promoter region and <i>sspB</i> gene                       | This study |
| pHN84  | <i>sspA</i> promoter region and gene with 6x His tag on the C-terminus | This study |
| pHN91  | <i>sspB</i> promoter and <i>sspA</i> gene                              | This study |
| pHN96  | <i>sspA</i> promoter region and 1130 gene                              | This study |
| pHN97  | <i>sspA</i> promoter region and 3080 gene                              | This study |
| pHN101 | <i>sspB</i> targeting CRISPR plasmid, <i>xyIR</i> promoter             | This study |
| pHN102 | <i>sspA</i> promoter region                                            | This study |
| pHN109 | <i>sspA</i> promoter region and <i>mCherry</i> gene                    | This study |

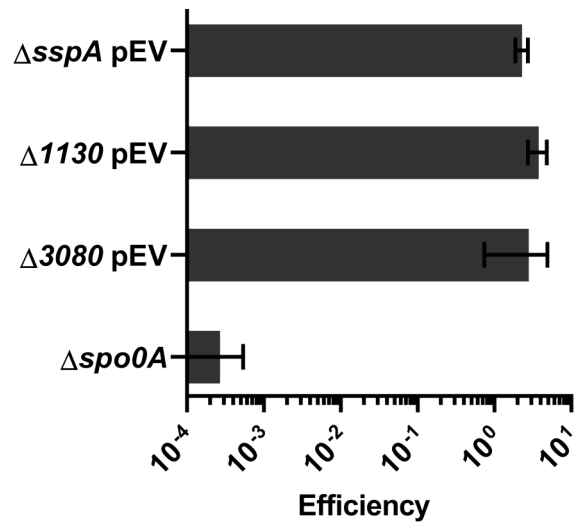

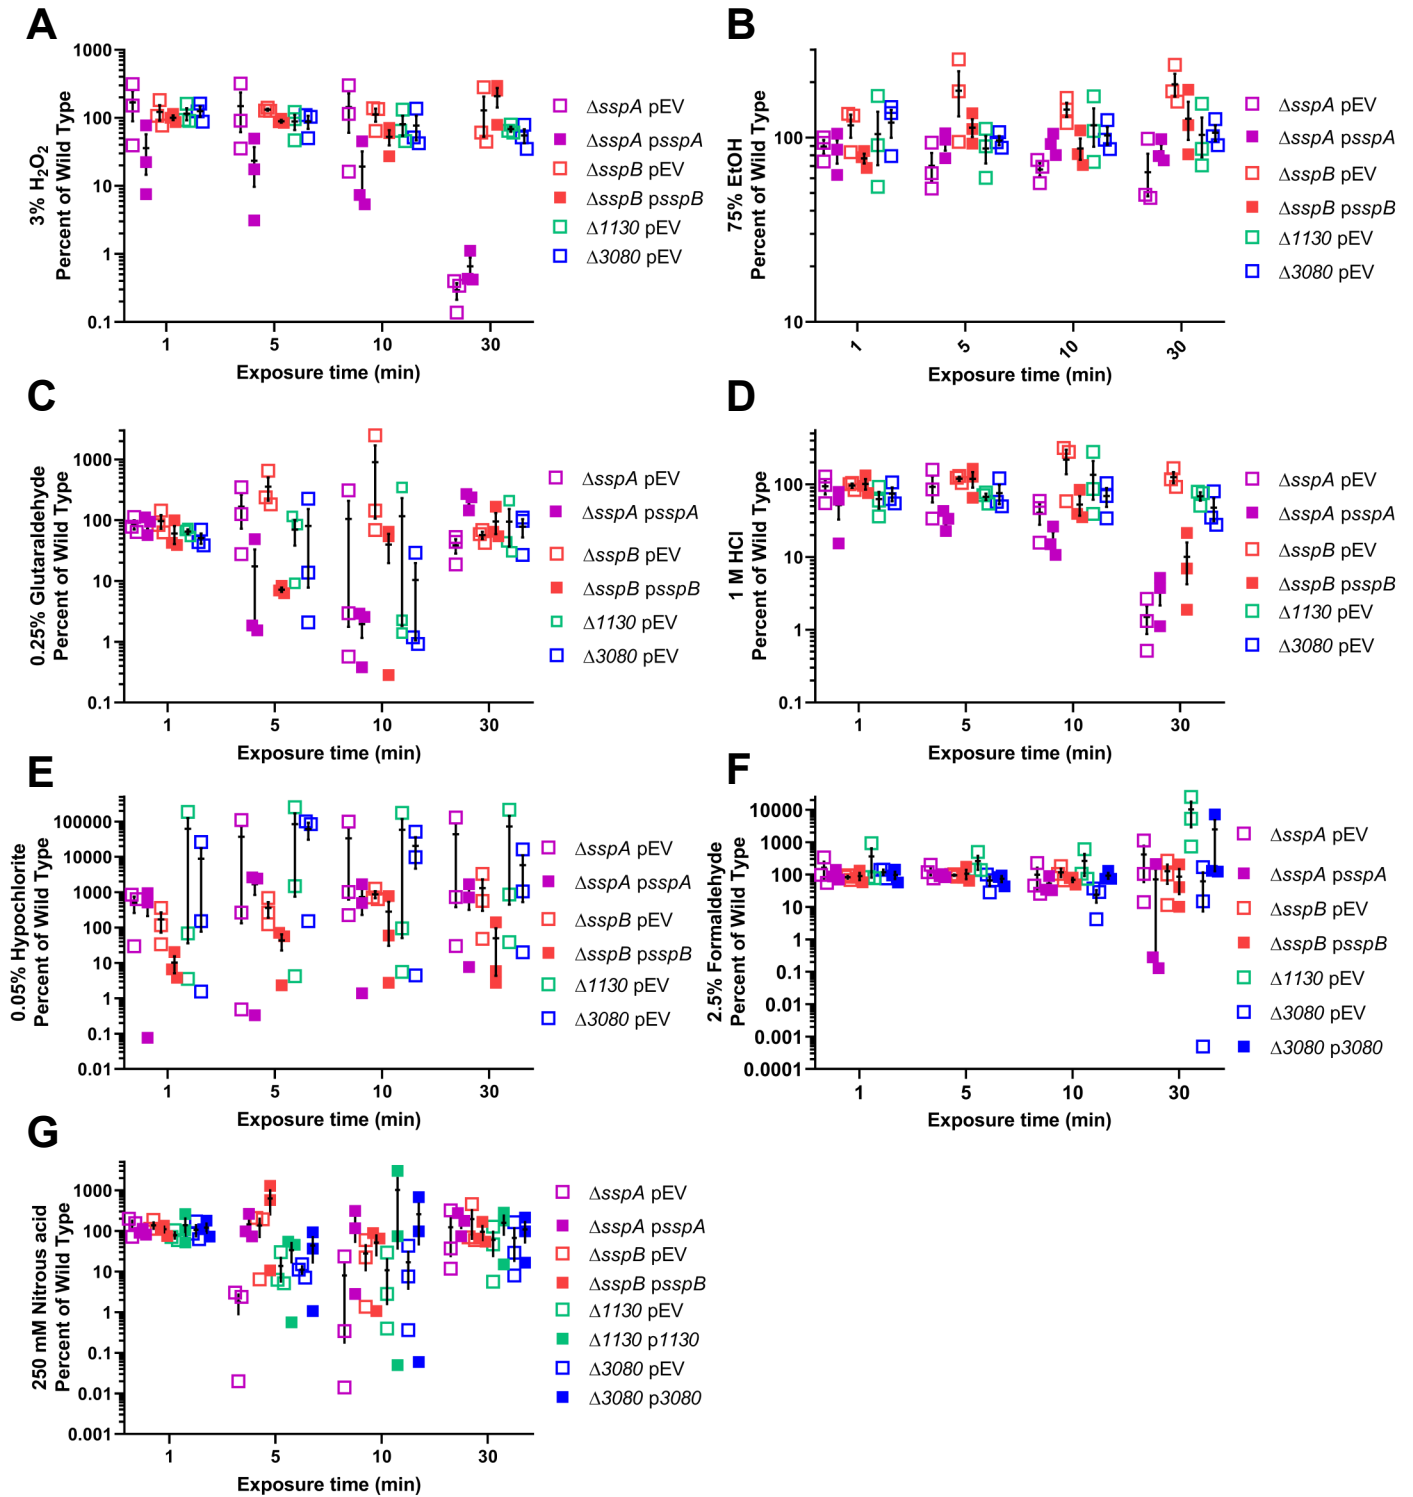

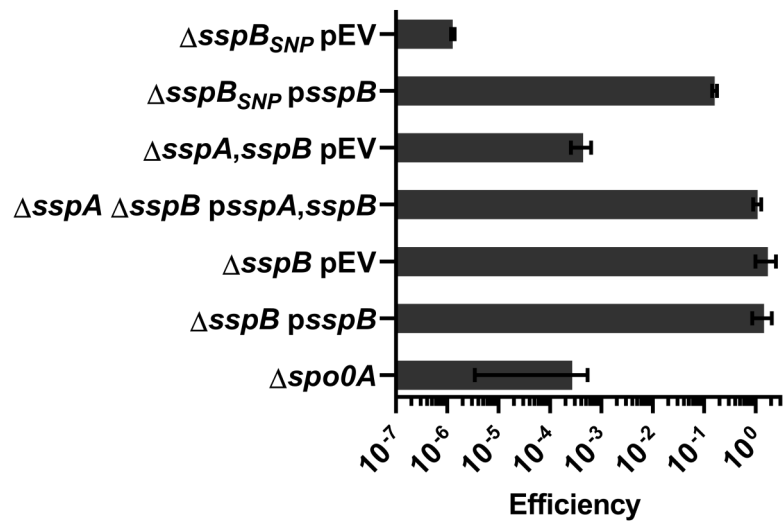



Germinants:

-

+

*R20291* pEV

$\Delta$ *sspB*<sub>SMP</sub> pEV

$\Delta$ *sspB*<sub>SMP</sub> pSSpB

*R20291* pEV

$\Delta$ *sspB*<sub>SMP</sub> pEV

$\Delta$ *sspB*<sub>SMP</sub> pSSpB

kDa

95

72

55

43

34

26

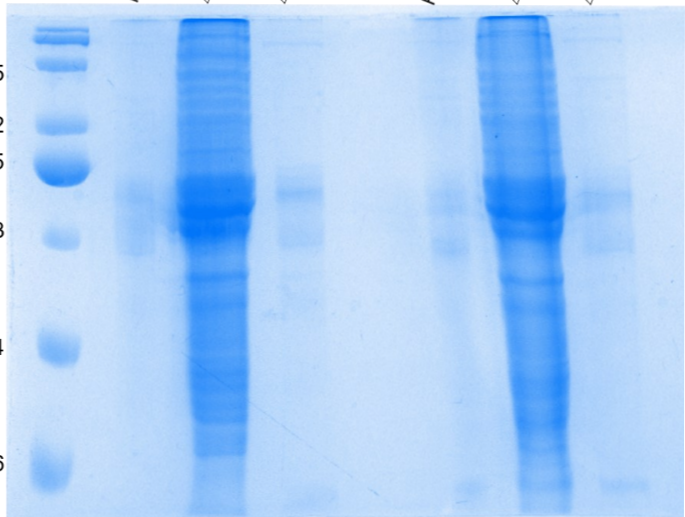

Source: https://www.biorxiv.org/content/10.1101/2021.03.29.437554v1.full.pdf
